# Supplementary material
Source: PubMed Central journal article supplement (PMC4874468)
Supplement: NIHMS62153-supplement-1.pdf [file NIHMS62153-supplement-1.pdf]

DNA sequences used for expression in *S.cerevisiae*

>slid2

TTAATTAACACCGGTGTATAAAACA**ATG**TACTCTTTTCGAATTGGATAAGTTGAAGATTGAATTGAAGACTTGGGAACACG  
ATTTTCATTGACAAGAACAAGAGAGAACCAACCAGAGACGATATTAAGTCTTTGAGAACCCTTAGACAAATGTACAAGCAA  
TACTCTACCTTGAAGAAGAAGCAATCTTTGCAAAGACAAAAGGTCGACACTCAAGAATCCGTTGAATTGCCAGCTCACAA  
GAAGGACCACGATGAAGTTGTTGAAATCGGTCCAACCTCCACAAGTCTACGGTAAGGCTATTTCTATTTTCGACATGAAC  
TGTCTCCAATCAAGCCAATTTACATGACTTCTACTAACAACATCGACGTTAACAACGATAACTCTAAGACTATCTCTAAC  
GAATCTTCCCCAAGAAAGACTATTTTGTGTAAGTCTCTCCAGCTGACAGAACCTTTGGTTCGCTGAACCAATCTCTTCCGT  
TAAGAGACAATTGAACTTCCAAATGTTGAACGCTTCTTCTACTAGAACTCCAACCTCTTCTCCATGTAAGAACAGAAACG  
GTAAGTTGGTTGAAATCAAGAAGTGTCTCCAACCATTAAACCCACCATTGGAATCTGGTAAGCCATCTGGTTACTACGGT  
CCAAACTCTCCATTGAAGTTGGACGAAGAAAACATCCACTTGAACATCTCCTTGAACCTCTCCACTAAGAGAAGATTGCA  
AATTGCTTACCCATCTTTGCAAAGACTCCATCCAAGGACCAAGCTGATATCTCCACTTCTTCTCCCCATCCCCATTGA  
TTAGAAGACCATTGACTAAGTCTTTGATCGAATTGGCTAGAGAACACACTGAAATCGTCAAGGAATTCGGTGTCTTGCAA  
GAAGAAGACATTGAAGAAGAAGAAGGTTGAAGAAGGTGAAAACGGTTACGACGAAAAGAACCACGAAGATGATTTCCG  
TTTGGAAAGACGAATTGATTAGACCAAAGGTTGTTAAGGATATTTTCCAAGAAGACGACGACAACGACGACTCTCAAGCTA  
GAGAAGACTTTTATTAGAAAAGAGACCAAAGAGAAGAAGGTTATTAGAAGATTGAGAGACAACGATCCAGAACTGAA  
ACTGCTGGTTTCGAAAGAGATGTTTCAACAAGGAATTTGGTCAAGTTGAAGAGAAGAAGGTTGCTGAATCTTGGGTTCCAC  
CTCTCAAATTTCTGACACCGAATTCGAACACGACCAGAAGCTTCTTCTGGTGTGTTGTTTCTCCGAACAAAAGCCAAACCG  
CTAAGAGAAGGTTAGAAAAGTACAACCTGGTCTCTAACAACACTTCAAGAAGATTGAAGTTGCCAAAAGAAGAACAGATT  
TCCAACCGTAGATGGGTTAGAAAGAT**TAA**ATTGAATTGAATTGAAATCGATAGATCAATTTTTTTCTTTTCTTTTCCCCAT  
CCTTTACGCTAAAATAATAGTTTTATTTTTATTTTTTGAATATTTTTTATTTATATACGTATATATAGACTATTATTTATCT  
TTTAATGATTATTAAGATTTTTATTAATAAAAAAATTCGCTCCTCTTTTAATGCCTTTATGCGCGGCCGCGGCGCGCC

>slid3

TTAATTAACACCGGTGTATAAAACA**ATG**GAAACCTGGGAAGTTATTGCTTCTGTAAAGGAAGCTACTAAGGGTTTGGACT  
TGTCTTGGACCACCCATTGATTATCAAGTCTGAAGACGTTCCATCTAACATCTTGCAATTGTGCAACAAAAGAACAGA  
AGACAATTGAAGCACATTTGTATGAAGTCCAGAAAGGAATACTTCTTGTGGAAGAATACGGTCCAGGTTTCTGGGTTAA  
GTGGCCATACAACTACTTCAACGGTTACTCCTTGCCAGAAAGAAGAACTGAAGTTGTTACTACTGTTGAAAGAGAAAGAG  
CTAAGAGAGAAACTTTGAAGACCTGGGATGAATTGAAGTCAAGGAATTGTTGCACCTTGTGGTCCGAAGAACC  
TCTTGTAAAGTTGAAAAGGACAAGGATTTGAAGTTGGATATGAACCCACCAGACATGAAGGGTGAATCCAAGATCAACGA  
TTACTACTCTGACCCAAAGGAATACATTGAATCCAAGTACTACGATGCTTTGTTCTCCATCCACACCCCATTTGGCTTACT  
TCGTTAAGTCTAACTTGGTCAGATTGAAGAACACTTGTAGAACTAAGTACGGTCTGACTCTTACAAGATCGCTTACCAA  
GCTATGTTGCAAAAGTTCTTGTGTCTATCGTCCAATTCAGGATAGACACGATAACAGATTGTTGTTGGAACCATTTCTC  
CTCTCCAATCGCTGATGAAAAGAGAAAAGAACTGTTTTGACCAAGTTTCGTCATCCAAGATGAAAACAAGAACTCTTCCACCA  
TTGCTGATTTGTGTGTCGTTTTGAAGTCTAGAGAAATCAAGTTGCAAACTTGTGTTGTTGTTGGAATTTATCGGTTTTGAAC  
GACTTGGATTGGAACCTTCAGAGATTTTCGAAAAGAAGTACAAGTTGAAGTTGAAGAAGAGATCTTTGAACTTGGACTAAGAA  
GGGTTTTGGTCCAGAAAGATCCAAGAAGAAGACTTCCGAAAAGGACAAGGGTATCGAAAAGAAATTACTACTTCTTTGGATT  
ACTGTGAACAATTGGATTTGTACTTGGACAGAGCTTGTATTTTGGACATTTTGTGTTGTTCTTCTGAAACCCCAAACCCAGAC  
GCTATTGAAGCTTCTAACGGTACCATTCAAGAACAAGAAGAACAATCTTGGATAAGTCTAAGGAAGCTTCTTGGTTGG  
TTTCATTAACCTACGCTTGTATCCATACTTCAACAAGAAGGTTCCACACGCTGTGCAATTCATTAATCAAAGTTGAAGG  
GTCCATCTATGAGACCAAAGAGAGCTTTGAAGAAGGTCAACGATTCCACTAACGTTTCTCTCCAAACACTGTGCAAAAC  
TACAACAGATTGTCCACCTCTCAAAGAGCTTCTAGATCTTCCATTATCAACTCTGTTCCATCTCTCCAGCTTTGAGAAG  
AGTCGACGCTAACTTGTCTCCAGAAAGTCTATTGCTTCTCCAACCTCCAGAATTGTTGAACTCCAGAACTAACTCTAACT  
TGAACGAATTCCTGGAATCCGAAACTAGATCTTTGAAGAGACCATCCCAATTGGGTAGAACCAAGTCCGACTTGACTATG  
AACCATTGCAAAAGAGACAATTTCTCCGTTTCCGACTTGTCTACCCTAGAGTCCCAACTCCTCTACCATCACTTTGAA  
GACCCCATTTCTCACTTACCATTAAACGCTTACAAGACCATGAACAACCTTTTCCAGAAGAGTTGGTAAGAGAAAGGACA  
TCAACGAAACTATCAGATTGCACGAAAGAGTTGATTCCGAAGAAAACGTTCCAAGTTCAAGCTACCCAGCTGTTAAGAAG  
AGAACTGTCACTCCAAACAAGAAGGCTCAATTGCAATCTATCATCGAATCCCAATTGAACTTCAAGGACGACGATAACCA  
CGAAGGTAGAAAAGAACACCTCTAACATTACTTCCACTCCAACCTAACAAGCCACCAGAAAACCTTCTAAGAGAAGAGTTA  
GAAGAAGATTGTTTCGCTCCAGAATCTACT**TAA**ATTGAATTGAATTGAAATCGATAGATCAATTTTTTTCTTTTCTTTT  
CCCATCCTTTACGCTAAAATAATAGTTTTATTTTTATTTTTTGAATATTTTTTATTTATATACGTATATATAGACTATTATT  
TATCTTTTAATGATTATTAAGATTTTTATTAATAAAAAAATTCGCTCCTCTTTTAATGCCTTTATGCGCGGCCGCGGCGCG  
CC

>slid7

TTAATTAACACCGGTGTATAAAACA**ATG**CTAGAAAGTTGTGTACCTTGAACCTCACCTTGTCTGGTAAGCAAGGTTCTT  
TGTTATTAGAGATATTC AATTGTGGTCCAACAGACCAACTGCTTCTAAGTCCACTTCCGAATTGAGAGGTCAATTCATT  
CAATACGTCGACTTGGCTAAGTTGCCATTGTGGGTCAGATCTACCAACATGAACACCTACAGATGTTACTCTACTTCCGC  
TACTGCTCAAGCTTACTTCAAGTCCAAGTTGAGAAACGCTAACAGAGGTATCGTCATTGAATTGTTGATAAGGTCGACC

AAAGATCTCAAGAACCAGCTTACTTGATTATTTTCAGAGAAAACACTGAATTGAACTGTTTCCAAGTCGACTTGACCATG  
AAGCACGAATTCGATGGTCAAGTCACTAAGTTGAAGCAAGACATTGGTAAGACCAGAGCTTCTGTCTCCAAGGAAGGTTCC  
CATCGATATCATTATTCAACAATCTCAACAAAGAAAGATCGGTACCAAGACTGAAGTTTACAGAAACGTTCCATCAACG  
ACAAGAGATTGCAATTCAACGAAACTTTGTCTAAGTTGATTTTGGGTGGTTTGGAGATTGAGAGGTATTTCCAACCTCTATT  
ACTGACTACCAAAAAGTTGTACAAGATTACCTTCGACGCTGCTGAATTCACCCACAGAGACGAATTGAAGAGAATCTCTAT  
GGGTTCTGGTGAAGAAGTTTCTTCGAATCTTTGCAAGAACTGTGCAAACTTGTGTTGAAGTTGTTCCACCAAGTCTT**TAAA**  
TTGAATTGAATTGAAATCGATAGATCAATTTTTTTCTTTTCTCTTTCCCATCCTTTACGCTAAAATAATAGTTTATTTT  
ATTTTTTGAATATTTTTTATTTATATACGTATATATAGACTATTATTTATCTTTTTAATGATTATTAAGATTTTTTATTTAA  
AAAAATTCGCTCCTCTTTTTAATGCCTTTATGCGCGGCCGCGCGCC

>Orc1

GGCGCGCTATAAAACA**ATGA**AGAGAAGATGGAAGAAGAACTTCATTGCTGTTTCTGCTGCTAACAGATTCAAGAAGATT  
TCTTCTTCTGGTGCCTTGGAAAACCTTGACTTCCAAGGTGAAATGGCTAAGACTTTGAAGGACTTGCAAGGTTGGGAAAT  
TATTACTACTGACGAACAAGGTAACATTATTGACGGTGGTCAAAAGAGATTGAGAAGAAGAGGTGCTAAGACTGAACACT  
ACTTGAAGAGATCTTCTGACGGTATTAAGTTGGGTAGAGGTGACTCTGTTGTTATGCACAACGAAGCTGCTGGTACTTAC  
TCTGTTTACATGATTCAAGAATTGAGATTGAACACTTTGAACAACGTTGTTGAATTGTGGGCTTTGACTTACTTGAGATG  
GTTGCAAGTTAACCCATTGGCTCACTACAGACAATCAACCCAGACGCTAACATTTTGAACAGACCATTGAACTACTACA  
ACAAGTTGTTCTCTGAAACTGCTAACCAAGCAATTTGACTGCTGCAATTTGGTGAATTGGTCAATTTGCAATTTGTTCAACTG  
ATTAGAGTTGCTAACGTTATGGACGGTCTAAGTGGGAAGTTTGAAGGGTAAACGTTGACCCAGAAAGAGACTTCACTGT  
TAGATACATTTGTGAACCAACTGGTGAAGAAGTTGCTTGACATTAACATTGAAGACGTTAAGGCTTACATTAAGAAGGTTG  
AACCAAGAGAAGCTCAAGAATACTTGAAGGACTTGACTTTGCCATCTAAGAAGAAGGAAATTAAGAGAGGTCCACAAAAG  
AAGGACAAGGCTACTCAAACCTGCTCAAATTTCTGACGCTGAAACTAGAGCTACTGACATTACTGACAACGAAGACGGTAA  
CGAAGACGAATCTTCTGACTACGAATCTCCATCTGACATTGACGTTTCTGAAGACATGGACTCTGGTGAATTTCTGCTG  
ACGAATTGGAAGAAGAAGAAGACGAAGAAGAAGACGAAGACGAAGAAGAAGAAAGGCTAGACACACTAACTCTCCAAGA  
AAGAGAGGTAGAAAAGATTAAAGTTGGGTAAGGACGACATTGACGCTTCTGTTCAACCACCACCAAGAAGAGAGGTAGAAA  
GCCAAAGGACCCATCTAAGCCAAGACAAAATGTTGTTGATTTCTTCTGTAGAGCTAACAACTCCAGTTATTAGAAAAGT  
TCACTAAGAAGAACGTTGCTAGAGCTAAGAAGAAGTACACTCCATTTCTAAGAGATTCAAGTCTATTGCTGCTATTCCA  
GACTTGACTTCTTTGCCAGAATTCTACGGTAACTCTTCTGAATTGATGGCTTCTAGATTCGAAAACAAGTTGAAGACTAC  
TCAAAGCACCAAAATGTTGAAACTATTTCTCTAAGGTTAAGAAGCAATTTGAACCTTCTTACGTTAAGGAAGAAATTT  
TGAAGTCTGCTAACTTCCAAGACTACTTGCCAGCTAGAGAAAACGAATTCGCTTCTATTTACTTGTCTGCTTACTCTGCT  
ATTGAATCTGACTCTGCTACTACTATTTACGTTGCTGGTACTCCAGGTGTTGGTAAGACTTTGACTGTTAGAGAAGTTGT  
TAAGGAATTGTTGCTTCTTCTGCTCAAAGAGAAATTCAGACTTCTTGTACGTTGAAATTAACGTTTGAAGATGGTTA  
AGCCAACTGACTGTTACGAAACTTTGTGGAACAAGGTTTCTGGTGAAGATTGACTTGGGCTGCTTCTATGGAATCTTTG  
GAATTTACTTCAAGAGAGTTCCAAAGAACAAGAAGAAGACTATTGTTGTTTTGTTGGACGAATTGGACGCTATGGTTAC  
TAAGTCTCAAGACATTTATGTACAACCTTCTCAACTGGACTACTTACGAAAACGCTAAGTTGATTGTTATTGCTGTTGCTA  
ACACTATGGACTTGCCAGAAAGACAATTTGGGTAACAAGATTACTTCTAGAATTTGGTTTCACTAGAATTTATGTTCACTGGT  
TACACTCACGAAGAATTGAAGAACATTATTGACTTGAGATTGAAGGGTTTGAACGACTCTTTCTTCTACGTTGACACTAA  
GACTGGTAAACGCTATTTTGAATTGACGCTGCTGGTAAACGACACTACTGTTAAGCAAACCTTTGCCAGAAGACGTTAGAAAAG  
TTAGATTGAGAATGCTGCTGACGCTATTGAAATTGCTTCTAGAAAAGTTGCTTCTGTTTCTGGTGGACGCTAGAAGAGCT  
TTGAAGGTTTGTAAAGAGAGCTGCTGAAATTTGCTGAAAAGCACTACATGGCTAAGCACGGTTACGGTTACGACGGTAAAGAC  
TGTTATTGAAGACGAAAACGAAGAACAATTTACGACGACGAAGACAAGGACTTGATTGAATCTAACAAAGGCTAAGGACG  
ACAACGACGACGACGACGACAACGACGGTGTCAAACCTGTTACATTACTCACGTTATGAAGGCTTTGAACGAACTTTG  
AACTCTCACGTTATTACTTTTATGACTAGATTGCTTTTCACTGCTAAGTTGTTTCAATTTACGCTTTGTTGAACCTTGATGAA  
GAAGAACGGTTCTCAAGAACAAGAATTGGGTGACATTGTTGACGAAATTAAGTTGTTGATTGAAGTTAACGGTTCTAACA  
AGTTTCGTTATGGAATTTGCTAAGACTTTGTTCCAACAAGGTTCTGACAACATTTCTGAACAATTGAGAATTTATTTCTTGG  
GACTTCGTTTTGAACCAATTTGTTGGACGCTGATTTTGTTCAGCAAACCTATGAAGAACGACAGAATTTGTTGTTGTTAA  
GTTGAACATTTCTGTTGAAGAAGCTAAGAGAGCTATGAAGCAAGCAAGCAAACTTTGAGAACTT**GTA**AATTGAATTGAATT  
GAAATCGATAGATCAATTTTTTTCTTTTCTTTCCCATCCTTTACGCTAAAATAATAGTTTATTTTTTATTTTTTGAATA  
TTTTTTATTTATATACGTATATATAGACTATTATTTATCTTTTTAATGATTATTAAGATTTTTTATTTAAAAAAATTCGCT  
CCTTTTTAATGCCTTTATGCCTCGAGTTAATTAA

>Orc2

TTAATTAACACCGGTGTATAAAACA**ATG**TTGAACGGTGAAGACTTCGTTGAACACAACGACATTTTGTCTTCTCCAGCTA  
AGTCTAGAAACGTTACTCCAAGAGAGTTGACCCACACGGTGAAGACAATGAGAAGAATTCACCTTCTAAGAAGAAC  
TTGTTGGAAAAGATTTCTTTGGTTGGTAAACGAAAGAAAGAACTTCTCCAGACCCAGCTTTGAAGCCAAAGACTCCATC  
TAAGGCTCCAAGAAAGAGAGGTAGACCAAGAAAGATTCAAGAAGAATTGACTGACAGAATTAAGAAGGACGAAAAGGACA  
CTATTTCTTCTAAGAAGAAGAGAAAGTTGGACAAGGACACTTCTGGTAAACGTTAACGAAGAATCTAAGACTTCTAACAAC  
AAGCAAGTTATGGAAGAAGACTGGTATTAAGGAAAAGAGAGAAAAGAGAAAAGATTCAAGTTGCTACTACTACTTACGAAGA  
CAACGTTACTCCACAACTGACGACAACCTCGTTTTCTAACTCTCCAGAACCACCAGAACCAGCTACTCCATCTAAGAAGT  
CTTTGACTACTAACCACGACTTCACTTCTCCATTGAAGCAAATTTATTTATGAACAACCTTGAAGGAATACAAGGACTCTACT

TCTCCAGGTAAGTTGACTTTGTCTAGAACTTCACTCCAACCTCCAGTTCCAAAGAACAAGAAGTTGTACCAAACCTTCTGA  
AACTAAGTCTGCTTCTTCTTTCTTGGACACTTTTCAAGGTTACTTTCGACCAAAGAAAGATTGTTAGAACTAACGCTAAGT  
CTAGACACACTATGTCCTATGGCTCCAGACGTTACTAGAGAAGAATTCTCTTTGGTTTCTAACTTCTTCAACGAAAACCTC  
CAAAGAGACCAAGACAAAAGTTGTTTCGAAATTCAAAAGAAGATGTTCCACAATACTGGTTTCGAATTGACTCAAGGTTT  
CTCTTTGTTGTTCTACGGTGTGGTTCTAAGAGAACTTCTTGGAGAATTCGCTATTGACTACTTGTCTCCAAAGATTG  
CTTACTCTCAATTGGCTTACGAAAACGAATTGCAACAAAACAAGCCAGTTAACTCTATTCCATGTTTGTATTTGAACGGT  
TACAACCCATCTTGTAACTACAGAGACGTTTTCAGGAAATTAAGTACTGACTTGTGGTTCCAGCTGAATTGACTAGATCTGA  
AACTAAGTACTGGGGTAACCACGTTATTTTGCAAATTCAAAAGATGATGACTTCTACAAGAACCAACCATTGGACATTA  
AGTTGATTTTGGTTGTTTCAAACTTGGACGGTCCATCTATTAGAAAAGAACACTTTCCAAACTATGTTGTCTTTCTTGTCT  
GTTATTAGACAAAATTGCTATTGTTGCTTCTACTGACCACATTTACGCTCCATTGTTGTGGGACAACATGAAGGCTCAAAA  
CTACAACCTCGTTTTCCACGACATTTCTAACTTCGAACCATCTACTGTTGAATCTACTTTCCAAGACGTTATGAAGATGG  
GTAAGTCTGACACTTCTTCTGGTGTGAAAGTGCTAAGTACGTTTTGCAATCTTTGACTGTTAACTCTAAGAAGATGTAC  
AAGTTGTTGATTGAACTCAAATGCAAAACATGGGTAACCTTGTCTGCTAACACTGGTCCAAAGAGAGGTAAGTCAAGAAC  
TGGTGTTGAATTGAAGTTGTTCAACCACTGTGTGCTGCTGACTTCATTGCTTCTAACGAAATGCTTTGAGATCTATGT  
TGAGAGAATTCATTGAACACAAGATGGCTAACATTACTAAGAACAACCTCTGGTATGGAATTTATTTGGGTTCCATACACT  
TACGCTGAATTGAAAAGTTGTTGAAGACTGTTTTGAACACTTTG**TAA**ATTGAATTGAATTGAAATCGATAGATCAATTT  
TTTTCTTTTCTCTTTCCCATCTTTACGCTAAAATAATAGTTTATTTTATTTTTTGAATATTTTTTATTTATATACGTA  
TATATAGACTATTTATCTTTTAAATGATTATTAAGATTTTTATTTAAAAAAAATTCGCTCCTCTTTTAAATGCCTTTAT  
GCGCGCCGCGGCGCGCC

>Orc3

GGCGCGCTATAAAACA**ATG**TCTGACTTGAACCAATCTAAGAAGATGAACGTTTCTGAATTCGCTGACGCTCAAAGATCT  
CACTACACTGTTTACCCATCTTTGCCACAATCTAACAAGAACGACAAGCACATTCCATTTCGTTAAGTTGTTGTCTGGTAA  
GGAATCTGAAGTTAACGTTGAAAAGAGATGGGAATTGTACCACCAATTGCACCTCTCACTTCCACGACCAAGTTGACCACA  
TTATTGACAACATTGAAGCTGACTTGAAGGCTGAAATTTCTGACTTGTGTACTCTGAAACTACTCAAAGAGAAGATGT  
TTCAACACTATTTTCTTGTGGGTTCTGACTCTACTACTAAGATTGAAATGAAGGACGAATCTTCTAGATACAACGTTTT  
GATTGAATTGACTCCAAAGGAATCTCCAAACGTTAGAATGATGTTGAGAAGATCTATGTACAAGTTGTACTCTGCTGCTG  
ACGCTGAAGAACACCCAACCTATTAAGTACGAAGACATTAACGACGAAGACGGTACTTCACTGAACAAAACAACGACGTT  
TCTTACGACTTGTCTTTGGTTGAAAACCTCAAGAGATTGTTCCGTAAGGACTTGGCTATGGTTTTCAACTTCAAGGACGT  
TGACTCTATTAACCTCAACACTTTGGACAACCTCATTATTTTTGTTGAAGTCTGCTTCAAGTACGACCACGTTAAGATTT  
CTTTGATTTTTCAACATTAACACTAACCTTGTCTAACATTGAAAAGAACTTGAGACAATCTACTATTAGATTGTTGAAGAGA  
AACTACCACAAGTTGGACGTTTTCTTCTAACAAGGTTTTCAAGTACGGTAACCAATTTTTCCAATCTTCTTGGACACTGT  
TGACGGTAAGTTGAACCTGTCTGACAGATTCGTTGAATTCATTTTGTCTAAGATGGCTAACAACACTAACCACAACCTTGC  
AATTGTTGACTAAGATGTTGGACTACTCTTGTATGTCTTACTTCTTCCAAAACGCTTTCTCTGTTTTTATTGACCCAGTT  
AACGTTGACTTCTTGAACGACGACTACTTGAAGATTTTTGTCTAGATGTCCAACTTTTCATGTTCTTCTGTTGAAGGTTT  
TAAGCAACACGCTCCAGCTGACGAAATTTTGTCTTTGTTGACTAACAGAACAGAGGTTTGGGAAGATTTCTTTCGTTGAAT  
TCTTGGTTAGAGAAAACCAATTAACGGTTCAGCTAAGTTTCGTTGCTAGATTTCTTGGGAAGAAGAAATGAACATTACTAAC  
TTCAACTTGATTGAATTGTACCACAACCTTGTGATTGGTAAGTTGGACTCTTACTTGGACAGATGGTCTGCTTGTAAAGGA  
ATACAAGGACAGATTGCACTTCGAACCAATTGACACTATTTTTCCAAGAATTGTTCACTTTGGACAACAGATCTGGTTTTGT  
TGACTCAATCTATTTTCCCATCTTACAAGTCTAACATTGAAGACAACCTGTTGTCTTGGGAACAAGTTTTGCCATCTTTG  
GACAAGGAAAACCTACGACACTTTGTCTGGTGACTTGGACAAGATTATGGCTCCAGTTTTTGGGTCAATTGTTCAAGTTGTA  
CAGAGAAGCTAACATGACTATTAACATTTACGACTTCTACATTGCTTTCAGAGAACTTTGCCAAAGGAAGAAATTTTTGA  
ACTTCATTAGAAAGGACCCATCTAACACTAAGTTGTTGGAATTGGCTGAAACTCCAGACGCTTTCGACAAGGTTGCTTTG  
ATTTTTGTTTCAAGCTATTTTTCGCTTTCGAAAACATGGGTTTTGATTAAAGTTCCAATCTACTAAGTCTTACGACTTGGT  
TGAAAAGTGTGTTTGGAGAGGTATTT**TAA**ATTGAATTGAATTGAAATCGATAGATCAATTTTTTCTTTTCTTTCCCA  
TCCTTTACGCTAAAATAATAGTTTATTTTATTTTTTGAATATTTTTTATTTATATACGTATATATAGACTATTTATTTATC  
TTTTAATGATTATTAAGATTTTTATTTAAAAAAAATTCGCTCCTCTTTAATGCCTTTATGCGGGCCCTTAATTAA

>Orc4

TTAATTAACACCGGTGTATAAAACA**ATG**ACTATTTCTGAAGCTAGATTGTCTCCACAAGTTAACTTGTGCAATTAAGA  
GACTCTAACGAAGAAGTTGAAGAAAAGTCTGCTGCTATTTTTGAAGAAGAGAACTATTGACAACGAAAAGTGAAGGACTCT  
GACCCAGGTTTCGGTCTTTTGCAAGAAGATTGTTGCAACAATTGTACGGTACTTTGCCAACTGACGAAAAGATTATTTT  
CACTTACTTGCAGACTGTCAACAAGAAAATTGACAGAATTATTAAGCAATCTATTATTCAAAGGAATCTCACTCTGTTA  
TTTTGGTTGGTCCAAGACAATCTTACAAGACTTACTTGTGGACTACGAATTGTCTTTGTTGCAACAATCTTACAAGGAA  
CAATTCATTACTATTAGATTGAACGGTTTTCACTTACTCTGAACAAAAGTCTATTAACGGTATTGCTACTCAATTGGAACA  
ACAATTGCAAAAAGATTCACGGTCTGAAGAAAAGATTGACGACACTTCTTTGGAACTATTTCTTCTGGTTCTTTGACTG  
AAGTTTTGCAAAAAGATTTTTGTTGTTGTTGGACTCTACTACTAAGACTAGAAACGAAGACTCTGGTGAAGTTGACAGAGAA  
TCTATTACTAAGATTACTGTTGTTTTCATTTTCGACGAAATTTGACACTTTTCGCTGGTCCAGTTAGACAAAACCTTTGTTGTA  
CAACTTGTTCGACATGGTTGAACACTCTAGAGTTCCAGTTTGTATTTTCGGTTGTACTACTAAGTTGAACATTTTGGAAAT  
ACTTGGAAAAGAGAGTTAAGTCTAGATTCTCTCAAAGAGTTATTTACATGCCACAATTCAAAACCTTGGACGACATGGTT

GACGCTGTTAGAACTTGTGACTGTTAGATCTGAAATTTCTCCATGGGTTTCTCAATGGAACGAACTTTGGAAAAGGA  
ATTGTCTGACCCAAGATCTAACTTGAACAGACACATTAGAATGAACTTCGAAACTTTTCAGATCTTTGCCAACTTTGAAGA  
ACTCTATTATCCATTGGTTGCTACTTCTAAGAAGCTTCGGTCTTTGTGTACTGCTATTAAGTCTTGTCTTTCTTTGGAC  
ATTTACAACAAGAACCAATTGTCTAACAAGCTGACTGGTAGATTGCAATCTTTGTCTGACTTGGAAATGGCTATTTTAT  
TTCTGCTGCTAGAGTTGCTTTGAGAGCTAAGGACGGTCTTTCAACTTCAACTTGGCTTACGCTGAATACGAAAAGATGA  
TTAAGGCTATTAAGTCTAGAATTCCTCAACTGTTGCTCCAAGTACTAAGTGGTACTGGTCAATCTACTTTCTCTATTGAC  
AACACTATTAAGTGTGGTTGAAGAAGGACGTTAAGAAGCTTTGGGAAAAGTGGTTCATTTGGACTTCTTCACTGAAAA  
GTCTGCTGTTGGTTGAGAGACAACGCTACTGCTGCTTTCTACGCTTCTAAGTACCAATTCGAAGTACTATGATTCCAT  
TCGACTTGAGATCTTACCAATGCAAAATATTTTGAAGAATTGAGAAGAATTATTCGAAAGTCTAACATGACTACTCT  
TGGACTCAATTG**TAA**ATTGAATTGAATTGAAATCGATAGATCAATTTTTTTCTTTTCTTTTCCCCATCCTTTACGCTAA  
AATAATAGTTTATTTTATTTTTTTGAATATTTTTTATTTATATACGTATATATAGACTATTATTTATCTTTTAATGATTAT  
TAAGATTTTTTATTAATAAAAAAATTCGCTCCTCTTTTAATGCCTTTATGCGCGGCCGCGCGCC

>Orc5

GGCGCGCCTATAAAACA**ATG**AACGTTACTACTCCAGAAGTTGCTTTCAGAGAATACCAAAGTAACTGTTTGGCTTCTTAC  
ATTTCTGCTGACCCAGACATTACTCCATCTAAGTTGATTTTGAAGGTTACTCTGGTACTGGTAAGACTTACACTTTGAA  
GAAGTACTTCAACGCTAACCAACTTGCACGCTGTTGGTTGGAAACCAGTTGAATTGGTTCCTTGGAAAGCCATTGTTGC  
AAGTATTGCTAGAAGTGTCAATACAAGTTGAAGACTTTGTACCCAAACATTTCAACTACTGACTACGACCCATTGCCAA  
GTTGAAGAACCATTCTTGTGGTTAAGACTTTGCACAACATTTTCGTTCATACGAATCTTTGCAAGAAAAGACTTGT  
GTTCTTGATTTTGGACGGTTTTCGACTCTTTGCAAGACTTGGACGCTGCTTTGTTCAACAAGTACATTAAGTTGAACGAAT  
TGTTGCCAAAGGACTCTAAGATTAACATTAAGTTTCAATTTACACTATGTTGGAAACTTCTTTCTTGGCAAAGATACTACT  
CACTGTATTCCAAGTGTATGTTCCCAAGATACAACGTTGACGAAGTTTCTACTATTTTTGGTTATGCTAGATGTGGTGA  
ATTGATGGAAGACTCTTGTGGTGGAAAAGAGAATTATTGAAGAACAATTTACTGACTGTACTGACGACCAATTCGAAAACG  
TTGCTGCTAACTTCATTCACTTGGATTGTTCAAGCTTTCCACTCTTACACTGGTAACGACATTTTCGCTTTGAACGACTTG  
ATTGACTTCAAGTGGCCAAAGTACGTTTCTAGAATTACTAAGGAAAACATTTTCGAACCATTGGCTTTGTACAAGTCTGC  
TATTAAGTTGTTCTTGTCTACTGACGACAACTTGTCTGAAAACGGTCAAGGTGAATCTGCTATTACTACTAACAGAGACG  
ACTTGGAAAAGTCTCAAAGTACGACTTGTCTATTATTTCTAAGTACTTGTGATTGCTTCTTACATTTGTTCTTACTTG  
GAACCAAGATACGACGCTTCTATTTTCTCTAGAAAGACTAGAATTATTCGAAGTGAAGCTGCTTACGGTAGAAGAAAGAA  
GAAGGAAGTTAACCAAGATACTTGAACCATCTTTGTTGCTATTGAAAGATTGTTGGCTATTTTCCAAGCTATTTTCC  
CAATTCAAGGTAAGGCTGAATCTGGTCTTTGCTGCTTTGAGAGAAGAATCTTTGATGAAGGCTAACATTGAAGTTTTT  
CAAACTTGTCTGAATTGCACACTTTGAAGTTGATTGCTACTACTATGAACAAGAACATTGACTACTTGTCTCCAAAGGT  
TAGATGGAAGGTTAACGTTCCATGGGAAATTTATTAAGGAAATTTCTGAATCTGTTCACTTCAACATTTCTGACTACTTCT  
CTGACATTCACGAAT**TAA**ATTGAATTGAATTGAAATCGATAGATCAATTTTTTTCTTTTCTTTTCCCCATCCTTTACGCT  
AAAATAATAGTTTATTTTATTTTTTTGAATATTTTTTATTTATATACGTATATATAGACTATTATTTATCTTTTAATGATT  
ATTAAGATTTTTTATTAATAAAAAAATTCGCTCCTCTTTTAATGCCTTTATGCCTCGAGTTAATTA

>Orc6

TTAATTAACACCGGTGTATAAAACA**ATG**TCTATGCAACAAGTTCAACACTGTGTTGCTGAAGTTTTGAGATTGGACCCAC  
AAGAAAAGCCAGACTGGTCTTCTGGTTACTTGAAGAAGTTGACTAACGCTACTTCTATTTTGTACAACACTTCTTTGAAC  
AAGGTTATGTTGAAGCAAGACGAAGAAGTTGCTAGATGTCACATTTGTGCTTACATTGCTTCTCAAAGATGAACGAAAA  
GCACATGCCAGACTTGTGTTACTACATTGACTCTATTCCATTGGAAACCAAGAAGGCTAAGCACTTGTGAACTTGTTC  
GACAATCTTTGTCTAAGTCTTCTCCAATGAAGCAATTCGCTTGGACTCCATCTCAAAGAAGAACAAGAGATCTCCAGTT  
AAGAACGGTGGTAGATTCACTTCTTCTGACCCAAAGGAATTGAGAAACCAATTTGTTGGTACTCCAAGTAAAGTTAGAAA  
GTCTCAAACAACGACTCTTTCGTTATTCCAGAATTGCCACCAATGCAAACTAACGAATCTCCATCTATTACTAGAAGAA  
AGTTGGCTTTTGAAGAAGACGAAGACGAAGACGAAGAAGAACCAGGTAACGACGGTTTGTCTTTGAAGTCTCACTTAAC  
AAGTCTATTACTGGTACTAGAAACGTTGACTCTGACGAATACGAAAACCAAGTCTGACCCAACTTCTGAAGAAGAAC  
ATTGGGTGTTCAAGAATCTAGATCTGGTAGAATAAGCAAAACAAGGCTGTTGGTAAGCCACAATCTGAATTGAAGACTG  
CTAAGGCTTTGAGAAAGAGAGGTAGAATTCCAAAGTCTTTGTTGGTTAAGAAGTACTGTAAGATGACTACTGAAGAAAT  
ATTAGATTGTGTAACGACTTTCGAATTGCCAAGAGAAGTTGCTTACAAGATTGTTGACGAATACAACATTAACGCTTCTAG  
ATTGGTTTTGTCCATGGCAATTGGTTTTGTGGTTTTGGTTTTGAACTGTACTTTCATTGTTTTTCAACGAAAGAAGAAGAAAG  
ACCAAGAATTGACCCTTCAATTGTTTTCTAAGATGTGTTCTTTGATGTTGACTTCTAAGGTTGACGACGTTATTGAATGT  
GTTAAGTTGGTTAAGGAATTGATTATTGGTGAAAAGTGGTTTCAAGACTTGGCAATTAGATACGACGACTTTCGACGGTAT  
TAGATACGACGAAAATTTTTCGAAAAGTTGGGTTCTATGTTGCAAACTACTAACATTTTGGTTACTGACGACCAATACA  
ACATTTGGAAGAAGAGAATTGAAATGGACTTGGCTTTGACTGAACCAT**TAA**ATTGAATTGAATTGAAATCGATAGATC  
AATTTTTTTCTTTTCTTTTCCCCATCCTTTACGCTAAAATAATAGTTTATTTTATTTTTTTGAATATTTTTTATTTATAT  
ACGTATATATAGACTATTATTTATCTTTTAATGATTATTAAGATTTTTTATTAATAAAAAAATTCGCTCCTCTTTTAATGCC  
TTTATGCGCGGCCGCGCGCC

>Clb5

TTAATTAACACCGGTGTATAAAA**CAATGA**AGAGAAGATGGAAGAAGAACTTCATTGCTGTCTCCGCTGCTAACAGATTCA  
AGAAGATTTCTTCTCTGGTGCTTTGGAAA**ACTTGTACTTCCAAGGTGAAATGGGTGAAAACCACGACCACGAACAATCC**  
ATTAAGAGAA**ACTCTATGATCTACAACGAAAACGAAAGACAATTGTGTA**ACTCCA**ACTTGAAGATCTTGCAAAAACAAGAG**  
AGCTTTGTCTAAGA**ACGATTCTTCTTCCAAGCAACAAGTTCAAGACTCTAAGCCAAGAAGAGCTTTGACCGACGTCCCAG**  
TCAACAACA**ACCCATTGTCTCAAAAACAAGAGAATTGTTGCTGGTTCTAAGGCTGCTAAGGTCAGAAGAGAAGAAAACATT**  
AGACCAATCGTTTCCGCTGTCCAAAAGAGACAA**ATCTACAACGATAGA**ACTGCTGCTGAACAAGAAGAAGAAGAAGA  
AGAAGGTGAAGACGATGACGCTGCTTCTATTGTTAACAAGAAGAGAAGAA**TCGATGCTGAAGGTGCTCTGAAATCGTTG**  
GTTGGCAAGACTTGGACTACGTCGAAAAGGATGATACCGCTATGGTTGCTGAATACTCTGCTGAAATCTTCGCTTTCTTG  
TACAGAAGAGAATTGGAA**ACTTTGCCATCCCACA**ACTACTTGTGGATAAGACTTCCAAGTACTACTTGGACCATCCAT  
GAGA**ACTATTTTGGTTGACTGGTTGGTTGAA**GTTCACGAAAAGTTCCAATGTTACCCAGAAA**ACTTTGTTCTTGTCTATTA**  
ACTT**GATGGATAGATTCTTGGCTAAGAACAAGGTCACTATGAACAAGTTGCAATTGTTGGCTGTTACCTCCTTGTTCATT**  
GCTGCTAAGTT**CGAAGAAGTCAACTTGCCAAAGTTGGCTGAATACGCTTACATTACTGATGGTGTGCTTCTAAGAACGA**  
TATTAAGA**ACGCTGAAATGTT**CATGTTGACCTCTTTGGAATTCAACATCGGTTGGCCAA**ACCCATTGAACTTCTTGAGAA**  
GAATCTCTAAGGCTGACGACTACGATCCAGTTA**ACAGAAACATCGGTAAGTTCATTTTGGAAATACGCTTACTGTTGTCAC**  
CAATTCATTCACTTGC**ACCATCTACTGTCTCCGCTATGGCTATGTACATCGCTAGAAGAATGACTAACAGAAACAAGAA**  
CGAAT**TGTGGAACGGTACCTTGCAACACTACTCTGGTGGTATCGATCCAATTCACGACGAAGCTTCCAATCCTTGTGTA**  
TCGATTTGGTCAAGGACATCGCTTCTTCCAAGACTCACTTGGATT**CCTTGATCTTGAAGTACAAGAAGCCAAGATACGGT**  
TCCGTTTACTTCCA**ACTTCAAGTGGTGTACCTCTGAAATGC**ACTCTA**ACTTCCAAA**ACTTGT**CTCAACTGAAGTAAAT**  
TGAAT**TGAATTGAAATCGATAGATCAATTTTCTTTCTTTTCCCA**CTTTTACGCTAAAATAATAGTTTATTTTA  
TTTTTTGAATATTTTATTTATATACGTATATATAGACTATTTATTTATCTTTTAAATGATTATTAAGATTTTATTTAA  
AAAATTCGCTCCTCTTTTAAATGCCTTTATGCGCGGCCGCGCGCC

>Cdc28

GGCGCGCTATAAAA**CAATG**TCCGGTGAATTGGCTAACTACAAGAGATTGGAAAAGGTTGGTGAAGGTACTTACGGTGTC  
GTCTACAAGGCTTTGGACTTGAGACCAGGTC**AAAGGTCAAAGAGTCGTCGCTTTGAAGAAGATTAGATTGGAATCCGAAGA**  
CGAAGGTGTCC**ATCTACTGCTATTAGAGAAATTTCTTTGTTGAAGGAATTGAAGGATGACAACATTTGTTAGATTGTACG**  
ACATTTGTTCACTCTGACGCTCACAAGTTGTACTTGGTTTTCGAAT**TCTTGGACTTGGACTTGAAGAGATACATGGAAGGT**  
ATTCCAAAGGACCA**ACCATTGGGTGCTGATATTGTTAAGAAGTTCATGATGCAATTGTGTAAGGGTATTGCTTACTGTCA**  
CTCTCACAGAATTTTGCACAGAGATTTGAAGCCACAAA**ACTTGTGATCAACAAGGACGGTAACTTGAAGTTGGGTGACT**  
TCGGTTTTGGCTAGAGCTTTCGGTGTCC**ATTGAGAGCTTACACTCACGAAATTTGTTACTTTGTGGTACAGAGCTCCAGAA**  
GTTTTGTTGGGTGGTAAGCA**ATACTCCACCGGTGTCGACACTTGGTCCATTGGTTGTATCTTCGCTGAAATGTGTAACAG**  
AAAGCCAATCTTCTCTGGT**GATTCCGAAATTGATCAATTTTCAAGATTTTCAGAGTCTTGGGTACCCCAAACGAAGCTA**  
TTTGGCCAGATATTGTCTACTTGGCAGATTTCAAGCCATCCTTCCCA**CAATGGAGAAGAAAGGATTTGTCTCAAGTCGTT**  
CCATCTTTGGACCCAAGAGG**TATTGACTTGTGGACAAGTTGTTGGCTTACGACCCAATTAACAGAATCTCCGCTAGAAG**  
AGCTGCTATCCACC**ATACTTCCAAGAATCTTAAAT**TGAATTGAATTGAAATCGATAGATCAATTTTTTTCTTTTCTCTT  
TCCC**ATCCTTTACGCTAAAATAATAGTTTATTTTATTTTTTGAATATTTTTTATTTATATACGTATATATAGACTATTA**  
TTTATCTTTTAAATGATTATTAAGATTTTATTTAA**AAAAAATTCGCTCCTCTTTTAAATGCCTTTATGCctcgagTTAATT**  
AA

>Cks1

TTAATTAACACCGGTGTATAAAA**CAATG**TACCACC**ACTACCACGCTTCCAAGGTAGAAAGTTGACCGATCAAGAAAGAG**  
CTAGAGTCTTGGAA**TCCAAGACTCTATTC**ACTACTCCCAAGATACTCTGACGACA**ACTACGAATACAGACACGTCATG**  
TTGCCAAAGGCTATGTTGAAGGT**CATTCCATCCGATTACTTCAACTCTGAAGTTGGTACTTTGAGAATCTTGACTGAAGA**  
TGAATGGAGAGGTTGGGTATCAC**CCAATCCTTGGGTGGGAACACTACGAATGTCACGCTCCAGAACCACACATCTTGT**  
TGTTCAAGAGAC**CATTGAACTACGAAGCTGAATTGAGAGCTGCTACTGCTGCTCAACAACAACAACAACAACAACA**  
CAACAACAACAACAACAACAACA**CAACCAACTCAATCTATCTAACGACATGCAAGTCCCACCACAAATTTCTTAAAT**  
TGAAT**TGAATTGAAATCGATAGATCAATTTTCTTTTCTTTTCCCA**CTTTTACGCTAAAATAATAGTTTATTTTA  
TTTTTTGAATATTTTATTTATATACGTATATATAGACTATTTATTTATCTTTTAAATGATTATTAAGATTTTATTTAA  
AAAATTCGCTCCTCTTTTAAATGCCTTTATGCGCGGCCGCGCGCC

>Pol2

GGCGCGCTATAAAA**CAATGATG**TTCGGTAAAGAAGAACAACCGTGGTTCTTCTACTGCTAGATACTCTGCTGGTAAC  
AAGTACAACACTTTGTCTAACA**ACTACGCTTTGTCTGCTCAACAATGTTGAACGCTTCTAAGATTGACGACATTGACTC**  
TATGATGGGTTTCGAAAGATACGTTCCACCACA**ATACAACGGTAGATTCGACGCTAAGGACATTGACCAAATTCAGGTA**  
GAGTTGGTTGGTTGACTA**ACATGCACGCTACTTTGGTTTTCTCAAGAACTTTGTCTTCTGGTTCTAACGGTGGTGGTAAC**  
TCTAACGACGGTGAAGAGT**TACTACTA**ACCAAGGATTTTCTGGTGTGACTTCTACTTCTTGGACGAAGAAGGTGGTTC  
TTTCAAGTCTACTGTTGTTTACGACCC**ATACTTCTTCATTGCTTGTAAACGACGAATCTAGAGTTAACGACGTTGAAGAAT**  
TGTTAAGAAGTACTTGGAA**CTTGTGTTGAA**GTCTTTGCAAT**TATTAGAAAGGAAGACTT**GACTATGGACAACCACTTG  
TTGGGTTTGC**AAAAGACTTTGATTAAGTTGTCTTTGTTAACTCTAACCAATTTGTT**CGAAGCTAGAAAGTTGTTGAGACC  
AATTTTGC**AAAGACAACGCTAACAACAACGTTCAAAGA**AACATTTACAACGTTGCTGCTAACGGTCTGAAAAGGTTGACG

CTAAGCACTTGATTGAAGACATTAGAGAATACGACGTTCCATAACCAGTTAGAGTTTCTATTGACAAGGACATTAGAGTT  
GGTAAGTGGTACAAGGTTACTCAACAAGGTTTCATTGAAGACACTAGAAAAGATTGCTTTTCGCTGACCCAGTTGTTATGGC  
TTTCGCACATTGAACTACTAAGCCACCATTGAAGTTCAGACTCTGCTGTTGACCAAATTATGATGATTTCTTACATGA  
TTGACGGTGAAGTTTCTTGATTACTAACAGAGAAATTATTTCTGAAGACATTGAAGACTTCGAATACACTCCAAAGCCA  
GAATACCCAGGTTTCTTCACTATTTTCAACGAAAACGACGAAGTTGCTTTGTTGCAAAGATTCTTCGAACACATTAGAGA  
CGTTAGACCAACTGTTATTTCTACTTTCAACGGTGACTTCTTCGACTGGCCATTCATTCACAACAGATCTAAGATTACAG  
GTTTGGACATGTTTCGACGAAATTGGTTTCGCTCCAGACGCTGAAGGTGAATACAAGTCTTCTTACTGTTCTCACATGGAC  
TGTTTCAGATGGGTTAAGAGAGACTCTTACTTGCCACAAGGTTCTCAAGGTTTGAAGGCTGTTACTCAATCTAAGTTGGG  
TTACAACCCAATTGAATTGGACCCAGAATTGATGACTCCATAACGCTTTTCGAAAAGCCACAACACTTGTCTGAATACTCTG  
TTTCTGACGCTGTTGCTACTTACTACTTGTACATGAAGTACGTTTCAACCATTCAATTTTCTCTTTGTGTACTATTATTCCA  
TTGAACCCAGACGAACTTTGAGAAAAGGGTACTGGTACTTTGTGTGAAATGTTGTTGATGGTTCAAGCTTACCAACACAA  
CATTTTGTGGCCAAACAAGCACACTGACCCAATTGAAAGATTCTACGACGGTCACTTGTGGAACTCGAACTTACGTTG  
GTGGTACGTTGAATCTTTGGAAGCTGGTGTTCAGATCTGACTTGAAGAACGAATTCAAGATTGACCCATCTGCTATT  
GACGAATTGTTGCAAGAATTGCCAGAAGCTTTGAAGTCTCTGTTGAAGTTGAAAACAAGTCTTCTGTTGACAAGGTTAC  
TAACTTCGAAGAAATTAAGAACCAAATTACTCAAAGTTGTTGGAATTGAAGGAAAACAACATTAGAAACGAATTGCCAT  
TGATTTACCACGTTGACGTTGCTTCTATGTACCCAACATTATGACTACTAACAGATTGCAACCAGACTCTATTAAGGCT  
GAAAGAGACTGTGCTTCTTGTGACTTCAACAGACCAGGTAAAGACTTGTGCTAGAAAAGTTGAAGTGGGCTGGAGAGGTGA  
ATTTCTCCCATAGATGGACGAATAACAACATTGATTAAGAGACTTTGCAAAAACGAAACTTTCCAAACAAGAACAAGT  
TCTCTAAGAAGAAGTTTGTACTTTTCGACGAATTGTCTTACGCTGACCAAGTTATTACATTAAGAAGAGATTGACTGAA  
TACTCTAGAAAAGTTTACCACAGAGTTAAGGTTTCTGAAATTGTTGAAAGAGAAGCTATTGTTGTCAAAGAGAAAACCC  
ATTCTACGTTGACACTGTTAAGTCTTTTCAGAGACAGAAGATACGAATTCAAGGGTTTGGCTAAGACTTGGAAAGGTA  
TGTTCTAAGATTGACCCATCTGACAAGCACGCTAGAGACGAAGCTAAGAAGATGATTGTTTTGTACGACTCTTTGCAATTG  
GCTCACAAGGTTATTTTGAACCTTTTCTACGGTTACGTTATGAGAAAAGGTTCTAGATGGTACTCTATGGAAATGGCTGG  
TATTACTTGTGGTACTGTTGCTACTATTATTCAAATGGCTAGAGCTTTGGTTGAAAGAGTTGGTAGACCATTGGAATTGG  
ACACTGACGGTATTTGGTGTATTTTGCAAAAGTCTTTCCAGAAACTTACTTCTTCACTTTGGAAAACGGTAAGAAGTTG  
TACTTGTCTTACCCATGTTCTATGTTGAACTACAGAGTTTACCAAAAAGTTCACTAACCACCAATACCAAGAATTGAAGGA  
CCCATTGAACTACATTTACGAAACTCACTCTGAAAACACTATTTTCTTCGAAGTTGACGGTCCATACAAGGCTATGATTT  
TGCCATCTTCTAAGGAAGAAGGTAAGGGTATTAAGAAGAGATACGCTGTTTTCAACGAAGACGGTCTTTTGGCTGAATTG  
AAGGGTTTCGAATTGAAGAGAAGAGGTGAATTGCAATTGATTAAGAACTTCCAATCTGACATTTTCAAGGTTTCTTGG  
AGGTGACACTTTGGAAGTTGTTACTCTGCTGTTGCTTCTGTTTGTAAACAGATGGTTGGACGTTTGGACTCTCACGGTT  
TGATGTTGGAAGACGAAGACTTGGTTTCTTGTATTGTTGAAAACAGATCTATGTCTAAGACTTTGAAGGAATACGAAGGT  
CAAAAGTCTACTTCTATTACTACTGCTAGAAGATTGGGTGACTTCTTGGGTGAAGACATGGTTAAGGACAAGGGTTTGA  
ATGTAAGTACATTATTTCTTCTAAGCCATTCAACGCTCCAGTTACTGAAAGAGCTATTCCAGTTGCTATTTTCTCTGCTG  
ACATTCCAATTAAGAGATCTTTCTTGAGAAGATGGACTTTGGACCCATCTTTGGAAGACTTGGACATTAGAACTATTATT  
GACTGGGGTTACTACAGAGAAAGATTGGGTTCTGCTATTCAAAGATTATTACTATTCCAGCTGCTTTGCAAGGTGTTTC  
TAACCCAGTTCCAAGAGTTGAACACCCAGACTGGTTGAAGAGAAAAGATTGCTACTAAGGAAGACAAGTTCAAGCAAACCT  
CTTTGACTAAGTTCTTCTCTAAGACTAAGAACGTTCCAACCTATGGGTAAGATTAAGGACATTGAAGACTTGTTCGAACCA  
ACTGTTGAAGAAGACAACGCTAAGATTAAGATTGCTAGAACTACTAAGAAGAAGGCTGTTTCTAAGAGAAAAGAGAAAACCA  
ATTGACTAACGAAGAAGACCCATTGGTTTTGCCATCTGAAATTCCATCTATGGACGAAGACTACGTTGGTTGGTTGAACT  
ACCAAAAGATTAAGTGAAGATTCAAGCTAGAGACAGAAAGAGAAGAGACCAATTGTTCCGGTAACACTAACTCTTCTAGA  
GAAAGATCTGCTTTGGGTTCTATGATTAGAAAGCAAGCTGAATCTTACGCTAACTCTACTTGGGAAGTTTTGCAATACAA  
GGACTCTGGTGAACCAGGTGTTTTGGAAGTTTTGCTTACTATTAACGGTAAGGTTCAAAACATTACTTTCCACATTCCAA  
AGACTATTTACATGAAGTTCAAGTCTCAAACATATGCCATTGCAAAAAGATTAAGAAGTGTGTTGAAAAGTCTTCTGCT  
TCTTTGCCAAAACAACCCAAAGACTTCTAACCAGCTGGTGGTCAATTGTTCAAGATTACTTTGCCAGAATCTGTTTTCTT  
GGAAGAAAAGGAAAACGTACTTCTATTTTCAACGACGAAAACGTTTGGGTGTTTTTCGAAGGTACTATTACTCCACACC  
AAAGAGCTATTAAGGACTTGGGTGCTTCTGTTACTTTTCAGATCTAAGGCTATGGGTGCTTTGGGTAAGGGTATTCAACAA  
GGTTTTCGAAATGAAGACTTGTCTATGGCTGAAAACGAAAGATACTTGTCTGGTTTTCTCTATGGACATTGGTTACTGTT  
GCACTTCCAACCTTCTATTGGTTACGAATCTTCTCTTTGTTCAAGTCTTGGGGTGACACTATTACTATTTTGGTTTTGA  
AGCCATCTAACCAAGCTCAAGAAATTAACGCTTCTTCTTTGGGTCAAATTTACAAGCAAATGTTTCGAAAAGAAGAAGGGT  
AAGATTGAAACTTACTCTTACTTGGTTGACATTAAGGAAGACATTAACCTCGAATTCGTTTACTTCACTGACATTTCTAA  
GTTGTACAGAAGATTGCTCTCAAGAACTACTAAGTTGAAGGAAGAAAAGAGGTTTGAATTTCTGTTGTTGTTGCAATCTC  
CATTCATTACTAAGTTGTTGGGTACTATTAGATTGTTGAACCAAATGCCAATTGTTAAGTTGCTTTGAAACGAAGTTTTG  
TTGCCACAATTGAACTGGCAACCAACTTTGTTGAAGAAGTTGGTTAACCAGTTTTGTCTTCTGGTTCTTGGATTTCTCA  
CTTGATTAAGTTGCTCAATACTCTAACATTTCCAATTTGTAACCTTGAGATTGGACTCTATGGACTACATTATTGACGTTT  
TGTACGCTAGAAAAGTTGAAGAAGGAAAACATGTTTTGTGGTGAACGAAAAGGCTCCATTGCCAGACCACGGTGGTATT  
CAAAACGACTTCGACTTGAACACTTCTTGGATTATGAACGACTCTGAATTTCCAAAGATTAACAACCTCTGGTGTTTACGA  
CAACGTTGTTTTGGACGTTGGTGTGACAACCTGACTGTTAACACTATTTTGACTTCTGCTTTGATTAACGACGCTGAAG  
GTTCTGACTTGGTTAACAACAACATGGGTATTGACGACAAGGACGCTGTTATTAACCTCTCCATCTGAATTCGTTACAGC  
GCTTTCTCTAACGACGCTTTGAACGTTTTGAGAGGTATGTTGAAGGAATGGTGGGACGAAGCTTTGAAGGAAAACCTCTAC  
TGCTGACTTGTGGTTAACTCTTTGGCTTCTTGGGTTCAAACCCAAACGCTAAGTTGTTTCGACGGTTTTGTTGAGATACC

ACGTTTACAACCTTGACTAAGAAGGCTTTGTTGCAATTGGTTAACGAATTCCTCTGCTTTGGGTTCTACTATTGTTTACGCT  
GACAGAAACCAAATTTTGATTAAGACTAACAAAGTACTCTCCAGAAAACGTGTACGCTTACTCTCAATACATGATGAAGGC  
TGTTAGAATAACCCAATGTTCTCTTACTTGGACTTGAACATTAAGAGATACTGGGACTTGTGATTTGGATGGACAAGT  
TCAACTTCTCTGGTTTGGCTTGTATTGAAATGAAGAAAAGGAAAACCAAGACTACACTGCTGTTTCTCAATGGCAATTG  
AAGAAGTCTTGTCTCCAATTTACCAACCAGAATTCGAAGACTGGATGATGATTATTTTGGACTCTATGTTGAAGACTAA  
GCAATCTTACTTGAAGTTGAACTCTGGTACTCAAAGACCAACTCAAATGTTAACGTTAAGAAGCAAGACAAGGAAGACT  
CTGTTGAAAACCTTTTGAACGGTTTCTCTCACTTGTCTCTAAGCCATTGATGAAGAGAGTTAAGAAGTGTTCAGAAC  
CAACAAGAATTCATTTTGGACCCACAATACGAAGCTGACTACGTTATTCCAGTTTTTGGCAGGTTCTCACTTGAACGTTAA  
GAACCCATTGTTGGAATTGGTTAAGTCTTTGTGTCTCACGTTATGTTGTTGTCTAAGTCTACTATTTTGGAAATTAGAACTT  
TGAGAAAGGAATGTTGAAGATTTTTCGAATTGAGAGAATTCGCTAAGGTTGCTGAATTCAAGGACCCATCTTTGTCTTTG  
GTTGTTCCAGACTTCTTGTGTGAATACTGTTTCTTCACTTCTGACATTGACTTCTGTAAGGCTGCTCCAGAATCTATTTT  
CTCTTGTGTTAGATGTCACAAGGCTTTCAACCAAGTTTTGTTGCAAGAACACTTGATTCAAAAAGTTGAGATCTGACATTG  
AATCTTACTTGAATCAAGACTTGAAGATGTTCTAGATGTCACAAGGTTAAGAGAGACTACATGCTCTGCTCACTGTCCATGT  
GCTGGTGTCTGGGAAGGTACTTTGCCAAGAGAATCTATTGTTCAAAAAGTTGAACGTTTTTCAAGCAAGTTGCTAAGTACTA  
CGTTTTTCGACATTTTGTGTCTTGTATTGCTGACTTACTATT**TAA**ATTGAATTGAATTGAAATCGATAGATCAATTTTT  
TTCTTTTCTCTTTCCCATCCTTTACGCTAAAATAATAGTTTTATTTTATTTTTTGAATATTTTTTATTTATATACGTATA  
TATAGACTATTATTTATCTTTAATGATTATTAAGATTTTTATTAAAAAAAAAAATTCGCTCCTCTTTTAAATGCCTTTATGC  
CTCGAGTTAATTA

>Dpb2

TTAATTAAACACCGGTGTATAAAACA**ATG**TGTGAAATGTTTCGGTCTCGTAAACGTTTTTGGCAGTTAAGATTCAACCACCAT  
TGTTGAGACCATTGGCTTACAGAGTTTTGTCTAGAAAGTACGGTTTTGTCTATTAAGTCTGACGGTTTGTCTGCTTTGGCT  
GAATTCGTTGGTACTAACATTGGTGCTAACTGGAGACAAGGTCCAGCTACTATTAAGTCTTGGAAACAATTCGCTGCTGT  
TTGGAAGCAACAAGAAAGAGGTTTTGTTCAATTGACCAATCTGGTGTAAAGGAAGTTATTCAAGAAAATGAAGGAAAGAGAAA  
AGGTTGAATGGTCTCACGAACACCCAATTC AACACGAAGAAAACATTTGGGTAGAAGTACGACGACGAAAACAACCTCT  
GACGACGAAATGCCAATTGCTGCTGACTCTTCTTTGCAAAAACGTTTCTTTGTCTTCTCCAATGAGACAACCAACTGAAAG  
AGACGAATACAAGCAACCATTCAAGCCAGAATCTTCTAAGGCTTTGGACTGGAGAGACTACTTCAAGGTTATTAACGCTT  
CTCAACAACAAAAGATTCTCTTACAACCCACACAAGATGCAATTCATTTTCGTTCCAAACAAGAAGCAAAACGTTTTGGGT  
GGTATTGCTGGTTTTCTTGGCAGACATTGAAGACAAGGTTCAAATGTTCTTACTAGATACTACTTACTAACGACAGAGT  
TATGAGAAACGAAAACCTCCAAAACCTCTGACATGTTCAACCCATTGCTTCTATGGTTTTCTTTCGAAAACGAATTGTCTA  
ACACTAACAGACAACAACAATCTTCTTCTATGTCTATTACTCCAATTAAGAACTTGTGGGTAGAGACGCTCAAAAACCTC  
TTGTTGTTGGGTTTTGTTGAACAAGAACTTCAAGGGTAAGTGGTCTTTGGAAGACCCATCTGGTCTGTTGAAATTGACAT  
TTCTCAAACCTATTCCAACCTCAAGGTCACTACTACGTTCCAGGTTGTATGGTTTTGTTGAAGGTATTTACTACTCTGTTG  
GTAACAAGTTCCACGTTACTTCTATGACTTTGCCACCAGGTGAAAGAAGAGAAATTACTTTGGAAACTATTGGTAACCTTG  
GACTTGTGGGTATTCACGGTATTTCTAACAACAACCTTCATTGCTAGATTGGACAAGGACTTGAAGATTAGATTGCACTT  
GTTGAAAAGGAATTGACTGACCACAAGTTCGTTATTTTTGGGTGCTAACTTGTCTTGGACGACTTGAAGATTATGACTG  
CTTTGTCTAAGATTTTGCAAAAGTTGAACGACGACCCACCAACTTTGTTGATTTGGCAAGGTTCTTTCACTTCTGTTCCA  
GTTTTTCGCTTCTATGTCTTCTAGAAAACATTTCTTCTTCTACTCAATTCAGAACAACCTTCGACGCTTTGGCTACTTTGTT  
GTCTAGATTTCGACAACCTTACTGAAAACACTACTATGATTTTTCAATTCAGGTCCAAACGACTTGTGGGGTCTATGGTTTT  
CTTTGGGTGCTTCTGGTACTTTGCCACAAGACCCAATTCATCTGCTTTCACTAAGAAGATTAACAAGGTTTTGTAAGAAC  
GTTGTTTTGGTCTTCTAACCCTACTAGAATTGCTTACTTGTCTCAAGAAATGTTATTTTTAGAGACGACTTGTCTGGTAG  
ATTCAAGAGACACAGATTGGAATTCATTCACGAATCTGAAGACGTTTACTGAAAACGACAACATGATGTCTAAGG  
ACACTGACATTGTTCCAATTGACGAATTGGTTAAGGAACCAGACCAATTCGCACAAAAGGTTCAAGAACTAGAAAGTTG  
GTTAAGACTATTTTGGACCAAGGTCACTTGTCTCCATCTTGGACTCTTTGAGACCAATTTCTTGGGACTTGGACCACAC  
TTTGACTTTGTGTCCAATTCATCTACTATGGTTTTGTGTGACTACTTCTGCTCAATTCGACTTGACTTACAACGGTT  
GTAAGGTTATTAACCCAGGTTCTTTTCAATTCACAACAGAAGAGCTAGATACATGGAATACGTTCCATCTTCAAGAAGACT  
ATTCAGAAGAAATTTACATTT**TAA**ATTGAATTGAATTGAAATCGATAGATCAATTTTTTTTTCTTTTCTTTTCCCATCCT  
TTACGCTAAAATAATAGTTTTATTTTATTTTTTGAATATTTTTTATTTATATACGTATATATAGACTATTATTTATCTTTT  
AATGATTATTAAGATTTTTATTAAAAAAAAAAATTCGCTCCTCTTTTAAATGCCTTTATGC

>Dpb3

GGCGCGCTATAAAACA**ATG**TCTAACTTGGTTAAGGAAAAGGCTCCAGTTTTTCCCAATTTCTAAGGTTAAGAAGATTGCT  
AAGTGTGACCCAGAATACGTTATTACTTCTAACGTTGCTATTTCTGCTACTGCTTTTCGCTGCTGAATTGTTTCGTTCAAAA  
CTTGGTTGAAGAATCTTTGGTTTTGGCTCAATTGAACTCTAAGGGTAAGACTTCTTTGAGATTGCTTTGAACTCTATTG  
AAGAATGTGTTGAAAAGAGAGACAACCTCAGATTCCTGGAAGACGCTATTAAGCAATTGAAGAAGAACTCTGCTTTGGAC  
AAGAAGAGAGAATTGAACATGCAACCAGGTAGATCTGACCAAGAAGTGTATTGAAGAACCAGAATTGCACGAAGACGA  
CGGTGTTGAAGAAGAAGAAGAAGACGAAGTTTTCTGAAGAAGAAGAACCAGTTCACAACGAAGAATTGTTGGACGACT  
CTAAGGACCAACAAAACGACAAGTCTACTAGATCTGTTGCTTCTTTGTTGTCTAGATTCCAATACAAGTCTGCTTTGGAC  
GTTGGTGAACACTCTGACTCTTCTGACATTGAAGTTGACCACACTAAGTCTACTGACCCAT**TAA**ATTGAATTGAATTGAAA  
TCGATAGATCAATTTTTTTCTTTTCTTTTCCCATCCTTTACGCTAAAATAATAGTTTTATTTTATTTTTTGAATATTTT

TTATTTATATACGTATATATAGACTATTATTTATCTTTTAATGATTATTAAGATTTTTATTAAAAAAAATTCGCTCCTC  
TTTTAATGCCTTTATGCCTCGAGTTAATTAA

>Dpb4

TTAATTAACACCGGTGTATAAAACA**ATGC**CCACCAAAGGGTTGGAGAAAGGACGCTCAAGGTAACACCAACTACTTCTT  
ACATTAAGGAACAAGAAAACATTACTATTCAAGACTTGTGTTCCCAAAGTCTACTATTGTTAACTTGGCTAGAGAAGTT  
CCACAACAATCTGGTAAGAAGTTGTTGATTAAACAAGGACGCTTCTTTGGCTTTGCAAAGAGGTGCTACTGTTTTCGTTAA  
CCACTTGTGTTGTTGTCGCTAGAGAAATTGCTAAGTCTCAAGACAAGAGTCTTGTCTGTTGACGACGTTTTTGTCTGCTT  
TGGACCACATTGGTCACTCTGCTTTGAAGGGTCCAGTTAGAGACAAGTTGGACGAATACCAAGCTGCTGTTGAACAAAAGA  
AAGAAGGAAAAAGTTGGACTCTGGTGAAGTTGACGCTGACGGTGACATTGACATGGGTGAAGACAAGGAAAACGTTCCAGT  
TGAAAAGGTTAAGGAACACGACGAAATTGAAGAACAAGGTGACGCTTTGCAAGACGTTGAAGAATCTTCTGAAAAGAAGC  
AAAAGACTGAATCTCAAGACGTTGAAACTAGAGTTCAAACTTGGAACAACTGAAAACCTTGACTTCCAAGGTGAAAAG  
AGAAGATGGAAGAAGAACTTCATTGCTGTCTCCGCTGCTAACAGATTCAAGAAGATTTCTCTTCCGGTGCTTTG**TAAAT**  
TGAATTGAATTGAAATCGATAGATCAATTTTTTTCTTTTCTTTTCCCATCCTTTACGCTAAAAATAATAGTTTATTTTA  
TTTTTTGAATATTTTTTATTTATATACGTATATATAGACTATTATTTATCTTTTAATGATTATTAAGATTTTTATTAAAA  
AAAAATTCGCTCCTCTTTTAATGCCTTTATGCGCGGCCGCGCGCC

>Ctf4

TTAATTAACACCGGTGTATAAAACA**ATGA**AAGAGAAGATGGAAGAAGAACTTCATTGCTGTCTCCGCTGCTAACAGATTCA  
AGAAGATTTCTTCTCTGGTGCTTTGGAAAACCTTGTACTTCCAAGGTGAAATGGTCTCTGTCAATCGATAAGTTGGTCTTC  
GATTTCCGGTGGTAAGACCTTGGTTTTCTTGGCTCCAGATAACAACACTTTGTGTGTTGCTAACAGAACGGTTTTGACTAA  
GATTTTGAAGACTAACAAACCAGAAGAAGAACCGAAACCTTGGACTCCTCTAAGTTGGTCTCTTCCATCAAGTGTACT  
CTAACTCTCACTTCTTGATGACTACTATGCAAGGTGATGCTTTGAGATACAACATTGATTCTTCTCAAGAAGAATTGTTG  
GCTAGATTCGCTTTGCCATTGAGAGATTGTTGTGTTATTCCTCCGGTAAGATGGCTGTCTTCCGGTGGTGACGATTTGGA  
ATTGATTTTGTGGAATTGGATGACGAAACTCACAAGAAGCAGCTATCAAGATCGACGAAACAAGTCTCTCAAATTTCTT  
ACAACCTCTCAAATGAACATCTTGGCTGTTTCTATGATTAACGGTAAGGTTCAAATCTTCTCCTTGACTTCCACCATCCCA  
AACAAGGTTACGAATTGAACGACTACATTGTCGCTAACTCTTACGATGACACTCACAGAGACAAGATTTTGTCCAACAT  
GATGGACGACATTGACAAGGACAACGACAACGACTTGTCTGAAACTGCTGACCCAGACGAAAACAACGTTGCTGATCCAG  
AATCTGTGCTGCTAACAGAATTTGTACCAGAGTTGCTTGGCACCCAAAGGGTTTGCCTTCCGCTTTGCCATGTGCTGAC  
GATACTGTCAAGATCTTCTCTATTAAGGGTTACTCCTTGCAAAAGACCTTGTCTACCAACTTGTCTCCACTAAGGCTCA  
CTTCATTGATTTGCAATTCGACCCATTGAGAGGTACCTACATTGCTGCTGTCGATTTGAACAACAAGTTGACTGTTTGA  
ACTGGGAAACCTCCGAAATTCCTACACCAGAGAATTCAAGAGAAAGATTACTAACATTGCTTGGAAAGATTCAAGCTGAT  
TCTAAGACCTTGGACTTGGTCTTGGGTACTTGGTCTGGTCTTATTGCTATCGTTCAAACCTTGGCTGAATCCGTCGCTC  
CAACATTCAGACCAATCTGTTGCTGAATCCTCCACTAAGCAGGTTTGTTCGTTGACTCCGAATCTGACTTGGAAAAC  
TGGAAGGTAACGATGATATCAACAAGTCTGACAAGTTGTTCTCTGACATTACTCAAGAAGCTAACGCTGAAGATGTTTT  
ACCCAAACCCACGACGGTCCATCTGGTTTTGTCTGAAAAGAGAAAAGTACAACCTTCAAGATGAAGAAGACTTCATCGACGA  
CGACGACGGTGTGTTTACATCTCCGGTAAGAAGCCACACAACGAACACTCCTACTCCAGAGTTTACAAGACTCACTCCT  
TCCCAATTTCTTTGGCTAACACTGGTAAGTTTCAAGATACATGCCATTTCTCTCCAGCTGGTACCCCATTCGGTTTTCACTGAT  
AGAAGATACTTGACTATGAACGAAGTTGGTTACGTTTCCACTGTCAAGAACTCCGAACAATACTCTATTACTGTCTCCTT  
CTTCGATGTCCGGTAGATTCAAGAAATACCCTTCAAGACTTGTTCGGTTACGACTTGTGTTTTCTTGAACGAAAAGGGTA  
CTTTGTTCCGGTCAATCCAAGACCGGTCAAATTCATACAGACCACACGATTTCTATCCACTCCAACGGACCAAGATTATT  
CCATTGCAAGCTGGTGAAGAATCACTTCCGTCGCTGCTACTCCAGTCAAGATCATTGTCCGGTACCTCTTTGGGTTACTT  
CAGATCCTTCAACCAATTCGGTGTTCATTCGCTGTCGAAAAGACTTCTCCAATCGTCGCTTTGACTGCTCAAACTACA  
GAGTTTTCTCTGTTCACTACTCTCAATTCACGGTTTTGTCTTACTCCTTGTCCGAATTTGGGTACCTCTTCCAAGAGATAC  
TACAAGAGAGAAATGTCATTGCCAATGTCTTTGCCAAACATTAACCTGACATGAAGAAGGACGCTAACTGGATTACTA  
CAACTTCAACCCAAATGGGTATCAAGTCTTCTTCTTCTTACGGTGACCCATGTATTTTTCGGTTCCGACAACACTT  
TGTTGTTGTTGTCTAAGTGGAGATCTCCAGAAGAAATCAAGTGGTTGCCAATTTTTGGACTCAACATGGAATTTGGAAG  
ATGTCCGGTGGTAAGGAAACTACCGACATTCACGTCTGGCCATTGGCTTTGGCTTACGATACTTTGAAGTGTATCTTGGT  
TAAGGGTAAGCACATTTGGCCAGAATTTCCATTTGCCATTGCCATCCGAAATGGAATTAGAATGCCAGTTTTTCGTCAAGT  
CTAAGTTGTTGGAAGAAAACAAGGCTATCTTGAACAAGAAGAACGAAATCGGTGCTGACACTGAAGCTGAAGAAGGTGAA  
GAAGACAAGGAAATCCAATCCCAGTTTCCATGGCTGCTGAAGAAGAATACTTGAGATCTAAGGTCTTGTCTGAATTGTT  
GACTGACACCTTGGAAAACGATGGTGAAGTGTACGGTAACGAAAACGAAGTCTTGGCTGCTTTGAACGGTGTCTTACGATA  
AGGCTTTGTTGAGATTGTTTCGCTTCTGCTTGTCTGATCAAAACGTCGAAAAGGCTTTGTCTTGGCTCACGAATTGAAG  
CAAGACAGAGCTTTGACTGCTGCTGTCAAGATCTCCGAAAGAGCTGAATTGCCATCTTTGGTCAAGAAGATCAACAACAT  
CAGAGAAGCTAGATACGAACAACAATTTGAAG**TAA**ATTGAATTGAATTGAAATCGATAGATCAATTTTTTTCTTTTCTCTT  
TCCCATCCTTTACGCTAAAAATAATAGTTTATTTTTATTTTTGAATATTTTTTATTTATATACGTATATATAGACTATTA  
TTTATCTTTTAATGATTATTAAGATTTTTATTAAAAAAAATTCGCTCCTCTTTTAATGCCTTTATGCGCGGCCGCGCGC  
CGCC

>Topo II



GGCGCGCCTATAAAACA**ATG**TCTACTGAACCAGTCTCCGCTTCCGATAAGTACCAAAGATTTCTCAATTGGAACACATT  
TTGAAGAGACCAGACACTTACATCGGTTCTGTTGAAACCAAGAACAATTGCAATGGATTTACGATGAAGAAACCGACTG  
TATGATCGAAAAGAAGCTCACTATCGTTCAGGTTTGTTCAGATTTTCGATGAAATCTTGGTCAACGCTGCTGACAACA  
AGGTCAGAGATCCATCCATGAAGAGAATCGACGTCAACATCCACGCTGAAGAACACACCATTGAAGTCAAGAACGATGGT  
AAGGGTATCCCAATTGAAATTCACAACAAGGAAAACATTTACATTCCAGAAATGATTTTCGGTCACTTGTGACTTCTTC  
CAACTACGACGACGATGAAAAGAAGGTCACCGGTGGTAGAAACGGTTACGGTGTAAAGTTGTGTAACATTTTCTCTACTG  
AATTCATCTTGGAAACTGCTGACTTGAACGTCGGTCAAAGTACGTCCAAAAGTGGGAAAACAACATGTCCATTTGTCCAC  
CCACCAAAGATTACCTCTTACAAGAAGGGTCCATCCTACACCAAGGTCAC'TTTC AAGCCAGACTTGACTAGATTCCGGTAT  
GAAGGAATTGGATAACGACATCTTGGGTGTCATGAGAAGAAGAGTCTACGATATTAACGGTTCCGTTAGAGACATTAACG  
TTTACTTGAACGGTAAGTCTTTGAAAGATTAGAACTTCAAGAACTACGTCGAATTTGACTTGAAGTCC'TTGGAAAAGAAG  
AGACAATTGGACAACGGTGAAGATGGTGTGCTAAGTCCGATATTTCAACTATTTTGTACGAAAAGAAATTAACAACAGATG  
GGAAGTTGCTTTTCGCTGTCTCTGACATCTCTTCCAACAAATTTCTTTCGTCAACTCTATCGCTACCACCATGGGTGGTA  
CTCACGTCAACTACATTACCGATCAAAATCGTTAAGAAGATTTCCGAAATCTTGAAGAAGAAGAAGAAGTCCGTCAAG  
TCCTTCCAATTAAGAACAACATGTTTCATTTTCATTAACGTGTTTGAATGAAAACCCAGCTTTCAC'TTCTCAAAC TAAGGA  
ACAATTGACTACTAGAGTTAAGGATTTTCGGTCTAGATGTGAAATCCCATTGGAATACATTAACAAGATCATGAAGACTG  
ACTTGGCTACTAGAAATGTTTCGAAATCGCTGATGCTAACGAAGAAAACGCTTTCGAAAGTCCGATGGTACCAGAAAGTCT  
AGAATCACTAACTACCCAAAGTTGGAAGACGCTAACGAAGGCTGGTACTAAGGAAGGTTACAAGTGTACTTGTGCTTGGT  
TGAAGTGAATGCTGCTTTGCTTGGCTGTTGGTGTGTTGCTGCGGTAGAGACTACTACGGTTGTTGTTTACCATTGA  
GAGGTAAGATGTTGAACGTTAGAGAAGCTTCGCTGATCAAATTTTGAAGAACGCTGAAATCCAAGCTATTAAGAAGATT  
ATGGGTTTGAACACAGAAGAAGTACGAAGACACTAAGTCTTTGAGATACGGTCACTTGTATGATCATGACTGATCAAGA  
TCACGATGGTTCCACATTAAGGGTTTGATTATTAAC'TTCTTGGAAATCCTCCTTCCAGGTTTGTGGATATTCAAGGTT  
TCTTGTGGAAATTCATTACTCCAATTATCAAGGTTCTCCATCACCAAGCCAAC TAAGAACACTATCGCTTTTCTACAACATG  
CCAGATTACGAAAAGTGGAGAGAAGAAGAAATCTCACAAAGTTCACTTGGAAAGCAAAGTACTACAAGGGTTTGGGTACTTC  
CTTGGCTCAAGAAGTCAGAGAATACTTCTCCAAC'TTGGATAGACACTTGAAGATTTTCCACTCTTTCGAAAGGTAACGATA  
AGGACTACATCGATTTGGCTTTTCTCCAAGAAGAAGGCTGACGACAGAAAGGAATGGTTGAGACAATACGAACCAGGTACC  
GTTTTGGATCCAAC'TTGAAGGAAATTTCAAATCTCCGACTTCATCAACAAGGAATTGATCTTGTCTCCTTGGCTGATAA  
CATCAGATCTATCCCAAACGTTTTTGGACGGTTTCAAGCCAGGTCAAAGAAAGGTTTTGTACGGTTGTTTCAAGAAGAACT  
TGAAGTCTGAATTGAAGTTCGCTCAATTGGCTCCATACGTTTTCCGAATGTACCCTTACCACCACGGTGAACAATCTTTG  
GCTCAAACATCATCGGTTTGGCTCAAAC'TTCGTCGGTTCTAACAAACATCTACTTGTGTTGCCAAACGGTGTCTTTCGG  
TACCAGAGCTACCAGTGGTAAGGACGCTGCTGCTGCTAGATACATCTACACTGAATTGAACAAGTTGACCAGAAAGATCT  
TCCACCCAGCTGATGACCATTGTACAAGTACATCCAAGAAGACGAAAAGACCGTTGAACCAGAAATGGTACTTGGCAATT  
TTGCCAATGATTTTGGTCAACGGTGTGAAGGTATTGGTACCAGTTGGTCTACCTACATCCACCATTCAACCCATTGGA  
AATTATTAAGAACATTAGACACTTGTATGAACGACGAAGAATTGGAACAAATGCACCATGGTTCAGAGGTTGGACTGGTA  
CTATTGAAGAAATCGAACATTGAGATACAGAATGTACGGTAGAATTGAACAATCGGTGATAACGCTTTCGAAATCACT  
GAATTGCCAGCTAGAACTTGGACCTTACCATTAAGGAATACTTGTGTTGGGTTTGTCCGGTAAACGATAAGATCAAGCC  
ATGGATCAAGGACATGGAAGAACAACACGACGACAACATCAAGTTTCATTAATTACCTTGTCTCCAGAAGAAATGGCTAAGA  
CTAGAAAGATTGGTTTCTACGAAAGATTCAAGTTGATTTCTCCAATCTCTTTGATGAACATGGTTGCTTTTCGACCCACAC  
GGTAAGATTAAGAAGTACAACCTCTGTTAACGAAATTTTGTCCGAATTC TACTACGTCAGATTGGAATACTACCAAAGAG  
AAAGGACCACATGCTCGAAAGATTGCAATGGGAAGTCGAAAAGTACTCTTTC AAGTTAAGTTCAATCAAGATGATTATTG  
AAAAGGAATTGACTGTCACCAACAAGCCAAGAAACGCTATCATTCAAGAATTGGAAAAC'TTGGGTTTCCCAAGATTCAAC  
AAGGAAGGTAAGCCATACTACGGTTCTCCAACGACGAAATTTGCTGAACAAATCAACGATGTTAAGGGTGTACCTCTGA  
CGAAGAAGACGAAGAATCTTCCACGAAGACACTGAAAACGTTATCAACGGTCCAGAAGAATTGTACGGTACTTACGAAT  
ACTTGTGGGTATGAGAATTTGGTCTTTGACTAAGGAAAGATACCAAAAGTTGTTGAAGCAAAGCAAGAAAAGGAAACT  
GAATTGGAAAAC'TTGTGAAGTTGTCTGCTAAGGATATCTGGAACACTGACTTGAAGGCTTTCGAAGTTGGTTACCAAGA  
ATCTTTCGAAAAGACGCTGAAGCTAGAGGTGGTAACGTTCCAACAAGGGTTCCAAGACCAAGGGTAAGGGTAAGAGAA  
AGTTGGTTCGATGATGAAGATTACGACCCATCCAAGAAGAACAAGAAGTCCACTGCTAGAAAAGGGTAAGAAGATTAAAGTTG  
GAAGCAAGAACTTCGAAAGAATTTTGTGTTGGAACAAAAGTTGGTTACTAAGTCCAAGGCTCCAAC TAAGATCAAGAAGGA  
AAAGACTCCATCTGCTCTGAAACTAAGACTGAAGAAGAAGAAAACGCTCCATCCTCTACTTCCCTCCTCTCTATTTTCG  
ACATCAAGAAGGAAGACAAGGACGAAGGTGAATTGTCTAAGATCTCCAACAAGTTCAAGAAGATTTC TACCATTTTCGAT  
AAGATGGGTTCTACCTCCGCTACTTCCAAGGAAAACACTCCAGAACAAGATGACGTTGCTACCAAGAAGAACC AAACCAC  
TGCTAAGAAGACCGCTGTTAAGCCAAAAGTTGGCTAAGAAGCCAGTTAGAAAGCAAACAAAAGGTTGTCGAATTTGTCCGGTG  
AATCTGACTTGGAAATTTTGGATTCCCTACACCGACAGAGAAGACTCCAACAAGGACGAAGACGATGCTATTCCACAAAAGA  
TCTAGAAGACAAAAGATCTTCTAGAGCTGCTTCTGTTCCAAGAAGTCC TACGTTGAAACCTTGGAAATTTGTCCGATGACTC  
CTTCATTGAAGATGATGAAGAAGAAAACCAAGGTTCTGACGTTTCTTTC AACGAAGAAGATGAAAAC'TTGTACTTCCAAG  
GTGAAAAGAGAAGATGGAAGAAGAACTTCATTGCTGTCTCCGCTGCTAACAGATTC AAGAAGATTTCCCTCTTCCGGTGCT  
TTG**TAA**ATTGAATTGAATTGAAATCGATAGATCAATTTTTTTCTTTCTTTTCCCATCCTTTACGCTAAAATAATAGT  
TTATTTTATTTTGAATATTTTTTATTTATATACGTATATATAGACTATTTATTTATCTTTTAATGATTATTAAGATTTT  
TATTAATAAAAAAATTCGCTCCTCTTTTAAATGCCTTTATGCctcgagTAAATTA

>Rfa1

TTAATTAACACCGGTGTATAAAACA**ATGA**AGAGAAGATGGAAGAAGAACTTCATTGCTGTCTCCGCTGCTAACAGATTCA  
AGAAGATTTCTTCTCTGGTGTCTTTGGAAAACCTTGACTTCCAAGGTGAAATGTCTTCTGTCAATTGTCCAGAGGTGAT  
TTCCACTCCATCTTCACCAACAAGCAAAGATACGACAACCCAACCGGTGGTGTTTACCAAGTCTACAACACTAGAAAGTC  
TGACGGTGCTAACTCTAACAGAAAGAACTTGATTATGATTTCTGATGGTATCTACCACATGAAGGCTTTGTTGAGAAACC  
AAGCTGCTTCTAAGTTCCAATCTATGGAATTGCAAAGAGGTGACATCATTAGAGTCATTATTGCTGAACCAGCTATTGTC  
AGAGAAAGAAAGAAAGTACGTTTTGTTGGTTCGATGATTTTCAATTGGTCCAATCTAGAGCTGACATGGTTAACCAAACCTC  
CACCTTCTTGGACAACCTACTTCTCTGAACACCCAACGAAACCTTGAAGGACGAAGACATCACTGATTCGGGTAACGTCG  
CTAACCAAACCTAACGCTTCTAACGCTGGTGTCCAGACATGTTGCACCTCTAACTCTAACTTGAACGCTAACGAAAGAAAAG  
TTCGCTAACGAAAACCCAACCTCCCAAAAAGACCAGACCAATTTTCGCTATTGAACAATTGTCCCATAACAAAACGTTTG  
GACCATCAAGGCTAGAGTCTCTTACAAGGGTCAAATCAAGACTTGGCACAACCAAAGAGGTGACGGTAAGTTGTTCAACG  
TTAACTTCTTGGACACTTCTGGTGAATCAGAGCTACCGCTTTCAACGACTTCGCTACCAAGTTCACGAAATTTTGGAA  
GAAGGTAAGGTTTACTACGTTTCTAAGGCTAAGTTGCAACCAGCTAAGCCACAATTCACCAACTTGACTCACCCATACGA  
ATTGAACTTGATAGAGACTGTTATTGAAGAATGTTTCGACGAATCTAACGTCCTCAAAGACTCACTTCAACTTCATCA  
AGTTGGATGCTATTCAAAACCAAGAAGTTAACTCCAACGTTGACGCTTGGGTATCATTCAAACCTATTAACCCACACTTC  
GAATTGACTTCTAGAGCTGGTAAGAAGTTCGACAGAAGAGATATCACTATTGTTGACGACTCTGGTTTCTCTATTTCTGT  
TGTTTTGTGGAACCAACAAGCTTTGGATTCAACTTGCAGAAAGGTTCTGTTGCTGCTATTAAGGGTGTGACAGTACCG  
ACTTCGGTGGTAAGTCTTTGTCATGGGTTCTCTTCTTACCTTGATTCCAAACCCAGAAATTCAGAAGCTTACGCTTTG  
AAGGTTGGTACGATTTCAAGGGTAGAAACGCTAACTTCACTACCTTGAAGCAAGAACCAGGTATGGGTGGTCAATCCGC  
TGCTTCTTTGACTAAGTTCATTGCTCAAAGAATTACCATTGCTAGAGCTCAAGCTGAAAACCTGGGTAGATCCGAAAAGG  
GTGACTTCTTCTCTGTTAAGGCTGCTATCTCCTTCTTGAAGGTTGATAACTTCGCTTACCCAGCTTGTTCCAACGAAAAC  
TGTAACAAGAAGGCTTTGGAACAACCAGATGGTACCTGGAGATGTGAAAAGTGTGACACTAACACGCTAGACCAAACCTG  
GAGATACATCTTGACCATCTCCATTATCGACGAAACCAACCAATTGTGGTTGACTTTGTTTCGATGATCAAGCTAAGCAAT  
TGTTGGGTGTTGATGCTAACACTTTGATGCTTTGAAGGAAGAAGATCCAAACGAATTCACTAAGATCACTCAATCTATT  
CAAATGAACGAATACGATTTTCAAGATCAGAGCTAGAGAAGATACCTACAACGATCAATCTAGAATCAGATACACCGTTGC  
TAACTTGCACCTTTGAACTACAGAGCTGAAGCTGACTACTTGGCTGATGAATTGTCTAAGGCTTTGTTGGCT**TAA**ATTG  
AATTGAATTGAAATCGATAGATCAATTTTTTTCTTTTCTCTTTCCCATCCTTTACGCTAAAATAATAGTTTTATTTTATT  
TTTTGAATATTTTTTATTTATATACGTATATATAGACTATTATTTATCTTTTAAATGATTATTAAGATTTTTTATTA  
AAATTCGCTCCTCTTTTAAATGCCTTTATGCGCGGCCGCGCGCGCC

>Rfa2

GGCGCGCTATAAAACA**ATGG**CTACTTACCAACCATAACAACGAATACTCCTCTGTTACTGGTGGTGGTTTCGAAAACCTCC  
GAATCTAGACCAGGTTCCGGTGAATCTGAAACCAACACTAGAGTTAACACTTTGACTCCAGTTACTATTAAGCAAATTTT  
GGAATCTAAGCAAGACATCCAAGACGGTCCATTCGTCTCCACAACCAAGAATTGCACCACGTCTGTTTTCGTCGGTGTGCG  
TTAGAAACATCACCGACCACACTGCTAACATTTTCTTGAAGACGGTACTGGTCAAATGAAAGTTAGAAAGTGG  
TCTGAAGATGCTAACGACTTGGCTGCTGGTAACGATGATTCCTTCTGGTAAGGGTTACGGTTCCCAAGTCGCTCAACAATT  
CGAAATTTGGTGGTTACGTCAAGGTTTTTCGGTGTCTTTGAAGGAATTCGGTGGTAAGAAGAATCCCAATACGCTGTTATCA  
AGCCAATCGACTCCTTCAACGAAGTTTTGACTCACCACTTGGAAAGTCAATTAAGTGTCACTCTATTGCTTCCGGTATGATG  
AAGCAACCATTGGAATCTGCTTCCAACAACAACGGTCAATCTTTGTTTCGTTAAGGACGACAACGACACCTCTTCCGGTTC  
TTCTCCATTGCAAAGAATCTTGAATTCGTAAGAAGCAATGTGAAGGTAAGGACGCTAACTCCTTCGCTGTTCCAATTC  
CATTGATTTCTCAATCCTTGAACCTTGGATGAACTACCGTTAGAAAAGTGTGTACCACCTTGACTGACCAAGGTTTTCAAT  
TACCCAACCTTTCGATGATAACAACCTTCTTCGCTTTG**TAA**ATTGAATTGAATTGAAATCGATAGATCAATTTTTTTCTTTT  
CTCTTTCCCATCCTTTACGCTAAAATAATAGTTTTATTTTATTTTTTGAATATTTTTTATTTATATACGTATATATAGAC  
TATTATTTATCTTTTAAATGATTATTAAGATTTTTTATTAATAAAAAAAAAATTCGCTCCTCTTTTAAATGCCTTTATGCctcgaqT  
TAATTA

>Rfa3

TTAATTAACACCGGTGTATAAAACA**ATGG**CTTCTGAAACTCCAAGAGTTGATCCAACCGAAATTTCCAACGTTAACGCTC  
CAGTTTTTCAAGATATCGCTCAAATCAAGTCTCAACCAACTGAATCCCAATTGATCTTGCAATCTCCAACCTATCTCTTCC  
AAGAACGGTCTGAAGTCGAAATGATCACCTTGAACAACATTAGAGTCTCTATGAACAAGACTTTGAAATCGACTCCTG  
GTACGAATTCGCTCTGTAGAAACAACGACGACGGTGAATTGGGTTTCTTGATCTTGGACGCTGTTTTGTGTAAGTTCAAGG  
AAAACGAAGACTTGTCTTGAACGGTGTGTTGCTTTGCAAAGATTGTGTAAGAAGTACCCAGAAATTTACT**TAA**ATTGAA  
TTGAATTGAAATCGATAGATCAATTTTTTTCTTTTCTCTTTCCCATCCTTTACGCTAAAATAATAGTTTTATTTTATTTT  
TTGAATATTTTTTATTTATATACGTATATATAGACTATTATTTATCTTTTAAATGATTATTAAGATTTTTTATTA  
AATTCGCTCCTCTTTTAAATGCCTTTATGCGCGGCCGCGCGCGCC

>Pol1

TTAATTAACACCGGTGTATAAAACA**ATGT**CTTCTAAGTCTGAAAAGTTGAAAAGTTGAGAAAGTTGCAAGCTGCTAGAA  
ACGGTACTTCTATTGACGACTACGAAGGTGACGAATCTGACGGTACGAGAATTTACGACGAAATGACGAAAAGGAATAC  
AGAGCTAGAAAGAGACAAGAATTGTTGCACGACGACTTCGTTGTTGACGACGACGGTGGTTACGTTGACAGAGGTGT

TGAAGAAGACTGGAGAGAAGTTGACAACCTCTTCTTCTGACGAAGACACTGGTAACTTGGCTTCTAAGGACTCTAAGAGAA  
AGAAGAACATTAAGAGAGAAAAGGACCACCAAATTACTGACATGTTGAGAACTCAACACTCTAAGTCTACTTTGTTGGCT  
CACGCTAAGAAGTCTCAAAGAAGTCTATTCCAATTGACAACCTTCGACGACATTTTGGGTGAATTCGAATCTGGTGAAGT  
TGAAAAGCCAAACATTTTGTGGCATCTAAGTTGAGAGAAAACCTGAACTCTTCTCCAACCTCTGAATTCAGTCTTCTA  
TTAAGAGAGTTAACGGTAACGACGAATCTTCTCAGCAGCTGGTATTTCTAAGAAGGTTAAGATTGACCCAGACTCTTCT  
ACTGACAAGTACTTGGAAATTGAATCTTCTCCATTGAAGTTGCAATCTAGAAAGTTGAGATACGCTAACGACGTTCAAGA  
CTTGGTTGGACGACGTTGAAAACCTCTCCAGTTGTTGCTACTAAGAGACAAAACGTTTTGCAAGACACTTTGTTGGCTAAC  
CACCATCTGCTCAATCTTTGGCTGACGAAGAAGACGACGAAGACTCTGACGAAGACATTATTTGAAGAGAAGAACTATG  
AGATCTGTTACTACTACTAGAAAGAGTTAACATTTGACTCTAGATCTAACCCATCTACTTCTCCATTGTTACTGCTCCAGG  
TACTCCAATTGGTATTAAGGGTTTGGACTCCATCTAAGTCTTTGCAATCTAACACTGACGTTGCTACTTTGGCTGTTAACG  
TTAAGAAGGAAGACGTTGTTGACCCAGAAAACGACACTTTCCAAATGTTCTGGTTGGACTACTGTGAAGTTAACAACACT  
TTGATTTTGTTCGGTAAGGTTAAGTTGAAAGGACGACAACCTGTGTTTCTGCTATGGTTCAAATTAACGGTTTGTGTAGAGA  
ATTGTTCTTCTTGGCAAGAGAAGGTAAGACTCCAACCTGACATTCACGAAGAAATTAATCCATTGTTGATGGACAAGTACG  
GTTTGGACAACATTAGAGCTAAGCCACAAAAGATGAAGTACTCTTTCGAATTGCCAGACATTCCATCTGAATCTGACTAC  
TTGAAGGTTTTGTTGCCATAACAACTCCAAAGTCTTCTAGAGACACTATTCATCTGACTTGTCTTCTGACACTTTCTA  
CCAGTTTTTCGGTGGTAACTCTAACATTTTCGAATCTTTCGTTATTCAAACAGAATTATGGGTCCATGTTGGTTGGACA  
TTAAGGGTGTGACTTCAACTCTATTAGAAACGCTTCTCACTGTGCTGTTGAAGTTTCTGTTGACAAGCCACAAAACATT  
ACTCCAACCTACTAAGACTATGCCAAACTTGAGATGTTTGTCTTGTCTATTCAAACCTTTGATGAACCCAAAGGAAAA  
CAAGCAAGAAATGTTTCTATTACTTTGCTGCTTACAGAAACATTTCTTTGGACTCTCCAATTCCAGAAAACATTAAGC  
CAGACGACTTGTGACTTTGGTTAGACCACCACAATCTACTTCTTCCATTGGGTTTGGCTGCTTTGGCTAAGCAAAAAG  
TTGCCAGGTAGAGTTAGATTGTTCAACAACGAAAAGGCTATGTTGCTTGTCTTGTCTGCTATGTTGAAGGTTGAAGACCC  
AGACGTTATTATTTGGTACAGATTGCAAAAACGTTTACTTGGACGTTTTGGCTCACAGAATGCACGACTTGAACATTTCAA  
CTTTCTTCTTATTGTTAGAAAGATTGAGAAGAACTTGGCCAGAAAAGTTCGGTAGAGGTAACCTAACATGAACCACTTC  
TTCATTTCTGACATTTGTTCTGGTAGATTGATTTGTGACATTGCTAACGAAATGGGTCAATCTTTGACTCCAAAGTGTCA  
ATCTTGGGACTTGTCTGAAATGTACCAAGTTACTTGTGAAAAGGAACACAAGCCATTGGACATTGACTACCAAAACCCAC  
AATACCAAAACGACGTTAACTCTATGACTATGGCTTTGCAAGAAAACATTACTAACTGTATTGTTCTGCTGAAGTTTCT  
TACAGAATTCAATTTGTTGACTTTGACTAAGCAATTGACTAACTTGGCTGGTAACGCTTGGGCTCAAACCTTTGGGTGGTAC  
TAGAGCTGGTAGAAACGAATACATTTTGTGTCACGAATCTCTAGAAAACGGTTTCATTGTTCCAGACAAGGAAGGTAACA  
GATCTAGAGCTCAAAGCAAAGACAAAACGAAGAAAACGCTGACGCTCCAGTTAACTCTAAGAAGGCTAAGTACCAAGGT  
GGTTTGGTTTTCGAACAGAAAAGGGTTTGCACAAGAACTACGTTTTGGTTATGGACTTCAACTCTTTGTACCCATCTAT  
TATTCAGAATTCAACATTTGTTTCACTACTGTTGACAGAAAACAAGGAAGACATTGACGAATTGCCATCTGTTCCACCAT  
CTGAAGTTGACCAAGGTGTTTTGCCAAGATTGTTGGCTAACTTGGTTGACAGAAGAAGAGAAGTTAAGAAGGTTATGAAG  
ACTGAACTGACCCACACAAGAGAGTTCAATGTGACATTAGACAACAAGCTTTGAAGTTGACTGCTAACTCTATGTACGG  
TTGTTTTGGGTTACGTTAACTCTAGATTCTACGCTAAGCCATTGGCTATGTTGGTTACTAACAAGGTTAGAGAAATTTTGA  
TGAACACTAGACAATTTGGCTGAATCTATGAACCTTGTGGTTGTTTACGGTGACACTGACTCTGTTATGATTGACACTGGT  
TGTGACAACCTACGCTGACGCTATTAAGATTGTTTTGGGTTTTCAAGAGATTGGTTAACGAAAAGATACAGATTGTTGAAAT  
TGACATTGACAACGTTTTTCAAGAAGTTGTTGTTGCACGCTAAGAAGAAGTACGCTGCTTTGACTGTTAACTTGGACAAGA  
ACGGTAACGGTACTACTGTTTTGGAAGTTAAGGGTTTGGACATGAAGAGAAGAGAATTCTGTCCATTGTCTAGAGACGTT  
TCTATTACGTTTTTGAACACTATTTTGTCTGACAAGGACCCAGAAAGCTTTGCAAGAAGTTTACGACTACTTGGAAAG  
CATTAGAATTAAGGTTGAAACTAACAACATTAGAATTGACAAGTACAAGATTAACATGAAGTTGTCTAAGGACCCAAAGG  
CTTACCCAGGTGGTAAGAACATGCCAGCTGTTCAAGTTGCTTTGAGAATGAGAAAGGCTGGTAGAGTTGTTAAGGCTGGT  
TCTGTTATTACTTTCGTTATTACTAAGCAAGACGAAATTGACAACGCTGCTGACACTCCAGCTTTGTCTGTTGCTGAAAAG  
AGCTCACGCTTTGAACGAAGTTATGATTAAGTCTAACAACCTTGATTCCAGACCCACAATACTACTTTGAAAAGCAAATTT  
TCGCTCCAGTTGAAAGATTGTTGAAAAGAAATTGACTCTTTCAACGTTGTTAGATTGTCTGAAGCTTTGGGTTTGGACTCT  
AAGAAGTACTTCAGAAGAGAAGGTGGTAACAACAACGGTGAAGACATTAACAACCTTGAACCATTTGAAAACCTACTATTAC  
TGACGTTGAAAGATTCAAGGACACTGTTACTTTGGAATTGTCTTGTCCATCTTGTGACAAGAGATTCCCATTCGGTGGTA  
TTGTTTTCTTAACCTACTACAGAGTTTCTTACAACGGTTTTGCAATGTAAGCACTGTGAACAATTTGTTCACTCCATTGCAA  
TTGACTTCTCAAATGAACACTCTATTAGAGCTCACATTTCTTTGTTACTACGCTGGTTGGTTGCAATGTGACGACTCTAC  
TTGTGGTATTGTTACTAGACAAGTTTTCTGTTTTCGGTAAGAGATGTTTGAACGACGGTTGTACTGGTGTATGAGATACA  
AGTACTCTGACAAGCAATTGTACAACCAATTTGTTGTACTTTCGACTCTTTGTTTCCGACTGTGAAAAGAACAAGAAGCAAGAA  
TTGAAGCCAATTTACTTGGCAGACGACTTGGACTACCCAAAGGAACAATTTGACTGAATCTTCTATTAAGGCTTTGACTGA  
ACAAAACAGAGAATTGATGGAAACTGGTAGATCTGTTGTTCAAAGTACTTGAACGACTGTGGTAGAAGATACGTTGACA  
TGACTTCTATTTTCGACTTCATGTTGAACTAAATTGAATTGAATTGAAATCGATAGATCAATTTTTTTCTTTTCTTTCT  
CCCATCCTTTACGCTAAAATAATAGTTTATTTTATTTTTTGAATATTTTTTATTTATATACGTATATATAGACTATTAT  
TATCTTTTAATGATTATTAAGATTTTTATTAATAAAAAAATTCGCTCCTCTTTTAATGCCTTTATGCGCGGCCGCGGCG  
CC

>Pol12

GGCGCGCTATAAAACAATGCTCTGGTTCTATTGACGTTATTACTCACTTCGGTCCAGACGCTGACAAGCCAGAAATTATT  
ACTGCTTTGGAAAACCTGACTAAGTTGCACGCTTTGTCTGTTGAAGACTTGTACATTAAGTGGGAACAATTTCTTAACCA

AAGAAGACAAACTCACACTGACTTGACTTCTAAGAACATTGACGAATTCAGCAATTCCTTGCAATTGCAAATGGAAAAGA  
GAGCTAACCAAAATTTCTTCTTCTTCTAAGGTTAACACTTCTACTAAGAAGCCAGTTATTAAGAAGTCTTTGAACTCTTCT  
CCATTGTTGCGTTTGTCTATTCCAAAGACTCCAACCTTGAAGAAGAGAAAAGTTGCACGGTCCATTCTCTTTGTCTGACTC  
TAAGCAAACCTTACAACGTTGGTTCTGAAGCTGAACTAACGAAAAGGGTAACTCTTCTTTGAAAGTTGGAATTCCTCCAG  
GTATGGCTGAAGACGCTGTTGGTGACTCTGCTCCATTGTCTCACGCTAAGTCTTCTGACGCTAAGACTCCAGGTTCTTCT  
ACTTTCCAAACTCCAACACTAACAACACTCCAACACTACTTCTAGACAAAACGTTCCAGCTGGTGAAATTTTGGACTCTTTGAA  
CCCAGAAAACATTGAAATTTCTTCTGGTAACCCAAACGTTGGTTTGTGTCTACTGAAGAACCATTCTTACAACCAAGTTA  
AGGTTGAACCATTCTACGACGCTAAGAAGTACAAGTTTCAAGAACTATGAGACAAAACCTTGCAAGAAGCTTCTGACGTTTTG  
GACGACCAAAATGAACTTTTCTACTAAGATTATTTCAAACCCTACAAGTTGTCTCCAAACGACTTCGCTGACCCAACTAT  
TCAATCTCAATCTGAAATTTACGCTGTTGGTAGAATTGTTCCAGACTCTCCAACCTACGACAAGTTCTTGAACCCAGAAT  
CTTTGTCTTTGGAACTTCTAGAATGGGTGGTGTGGTAGAAGAGTTAGATTGGACTTGTCTCAAGTTAACGAATTGTCT  
TTCTTCTTTGGGTCAAATTTGTTGCTTTCAAGGGTAAGAACGCTAACGGTGACTACTTCACTGTTAACTCTATTTTGCATT  
GCCATACCCAAAACCTCCAGTTTCTACTTCTCAAGAATTGCAAGAATCCAAGCTAACTTGGAAAGTTCTTCTTTGAAGG  
TTATTGTTACTTGTGGTCCATACTTCGCTAACGACAACCTTCTCTTTGGAATTGTTGCAAGAATTCATTGACTCTATTAAC  
AACGAAGTTAAGCCACACGTTTTGATTATGTTCCGTCATTTCATTGACATTACTCACCCATTGATTGCTTCTGGTAAGTT  
GCCAACTTCCCACAATTCAAGACTCAACCAAGACTTTGGACGAATTGTTCTTGAAGTTGTTCACTCCAATTTTGAAGA  
CTATTTCTCCACACATTCAAATGTTTTGATTCCATCTACTAAGGACGCTATTTCTAACCCACGCTGCTTACCACAAGCT  
TCTTTGATTGAAGGCTTTGCAATTTGCCAAAGAACTTCAAGTGTATGGCTAACCCATCTTCTTCCAAATTTAACGA  
AATTTGATTTCGGTTGTTCTAACGTTGACACTTCAAGGACTTGAAGGAAGTTATTAAGGGTGTTACTTCTTCTTAGAT  
ACAGATTGGACAGAGTTTCTGAACACATTTTGAACAAGAAGATACTACCCAATTTTCCAGGTTCTATTAGAAGTAGA  
ATTAAGCCAAAGGACGTTTTCTACTAAGAAGGAACTAACGACATGGAATCTAAGGAAGAAAAGGTTTACGAACACATTTT  
TGGTGTGACTTGGACGTTTTCTTACTTGGGTTTACTGAAATTCGTTGGTGGTTTTCTCTCCAGACATTATGATTATTCCAT  
CTGAATTGCAACACTTCGCTAGAGTTGTTCAAACGTTGTTGTTATTAACCCAGGTAGATTCAATTAGAGCTACTGGTAAC  
AGAGGTTCTTACGCTCAAATTAAGTTCAATGTCCAGACTTGGAAAGACGGTAAGTTGACTTTGGTTGAAGGTGAAGAACC  
AGTTTACTTGCACAACGTTTGGAAAGAGAGCTAGAGTTGACTTGATTGCTTCTTAAATTGAATTGAATTGAAATCGATAGA  
TCAATTTTTTTCTTTTCTTTTCCCCATCCTTTACGCTAAAATAATAGTTTATTTTATTTTTTTGAATATTTTTTTATTTAT  
ATACGTATATATAGACTATTATTTATCTTTTAATGATTATTAAGATTTTTTATTAATAAAAAAATTCGCTCCTCTTTTAAATG  
CCTTTATGCctcgagTTAATTAA

>Pril

TTAATTAACACCGGTGTATAAAACAATGAAGAGAAGATGGAAGAAGAACTTCATTGCTGTCTCCGCTGCTAACAGATTCA  
AGAAGATTTCTTCTTCTGGTGCTTTGGAAAACCTGTACTTCCAAGGTGAAATGACTAACTCTGTTAAGACTAACGGTCCA  
TCTTCTTCTGACATGGAATACTACTACAAGTCTTTGTACCCATTCAAGCACATTTTCAACTGGTTGAACCACTCTCCAAA  
GCCATCTAGAGACATGATTAACAGAGAATTCGCTATGGCTTTCAGATCTGGTGCTTACAAGAGATACAACCTTTTCAACT  
CTGTTCAAGACTTCAAGGCTCAAATGAAAAGGCTAACCCAGACAGATTCGAAATGGTGCTATTTACAACAAGCCACCA  
AGAGAAAGAGACACTTTGTTGAAGTCTGAATTGAAGGCTTTGGAAAAGGAATTTGGTTTTTCGACATTGACATGGACGACTA  
CGACGCTTTCAGAACTTGTGTTCTGGTGCTCAAGTTTGTCTAAGTGTGGAAGTTTCAATTTCTTTGGCTATGAAGATTA  
CTAACACTGCTTTGAGAGAAGACTTCGGTTACAAGGACTTCATTTGGGTTTTCTCTGGTAGAAGAGGTTGCTCACTGTTGG  
GTTTTCTGACAAGAGAGCTAGAGCTTTGACTGACGTTCAAAGAAGAAAACGTTTTGGACTACGTTAACGTTATTAGAGACAG  
AAACTGACAAGAGATTGGCTTTGAAGAGACCATACCACCACACTTGGCTAGATCTTTGGAACAATTGAAGCCATTCT  
TCGTTTTCTATTATGTTGGAAGACGAAAACCCATGGGAAGACGACCAACACGCTATTCAAACCTTTGTTGCCAGCTTTGTAC  
GACAAGCAATTGATTGACTCTTTGAAGAAGTACTGGTTGGACAACCCAAGAAGATCTTCAAGGAAAAGTGAAGGACAT  
TGACCAAATTGCTACTTCTTTGTTCAAGGGTCCAAGCAAGACTCTCACATTATTAAGTTGAGAGAATGTAAGGAAGACT  
TGTTTTGATGACTTTGTACCCAAAGTTGGACGTTGAAGTTACTAAGCAAACCTATTCACTTGTGTAAGGCTCCATTCTGT  
ATTCACCCAGCTACTGGTAACGTTTGTGTTCCAATTGACGAATCTTTCGCTCCAGAAAAGGCTCAAAGTTGATTGACTT  
GCAAACCTGAAATGAAAAGAACAACGACGTTTCTTTGACTGCTTTGCAACCATTCAATTAACCAATTCACAGCTTACGTTT  
CTTCTTTGTTGAAGAACGAATTGGGTTCTGTTAAGAGAGAAAAGAGACGACGACGAACCAAGCTTCTTTGGACTTCTAA  
ATTGAATTGAATTGAAATCGATAGATCAATTTTTTTCTTTTCTTTTCCCCATCCTTTACGCTAAAATAATAGTTTATTT  
TATTTTTTTGAATATTTTTTTATTTATATACGTATATATAGACTATTATTTATCTTTTAATGATTATTAAGATTTTTTATTA  
AAAAAATTCGCTCCTCTTTTAAATGCCTTTATGCGCGGCCGCGCGGCC
